# Supplementary material for: Multicomponent synthesis of novel imidazole-pyran derivatives: in silico and in vitro studies
Source: Royal Society of Chemistry journal article supplement (doi:10.1039/d5ra05264e), 2026-01-01
Supplement: d5ra05264e1.pdf [file d5ra05264e1.pdf]

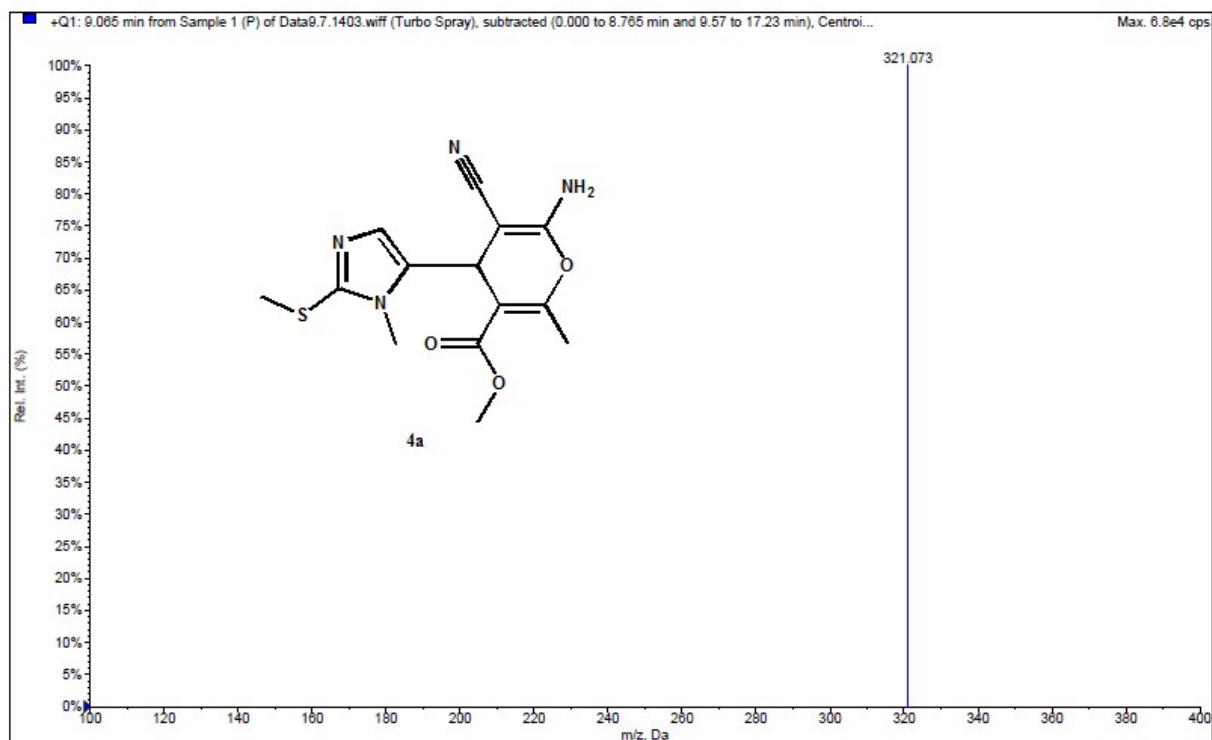

Figure S1: Mass spectrum of derivative **4a**

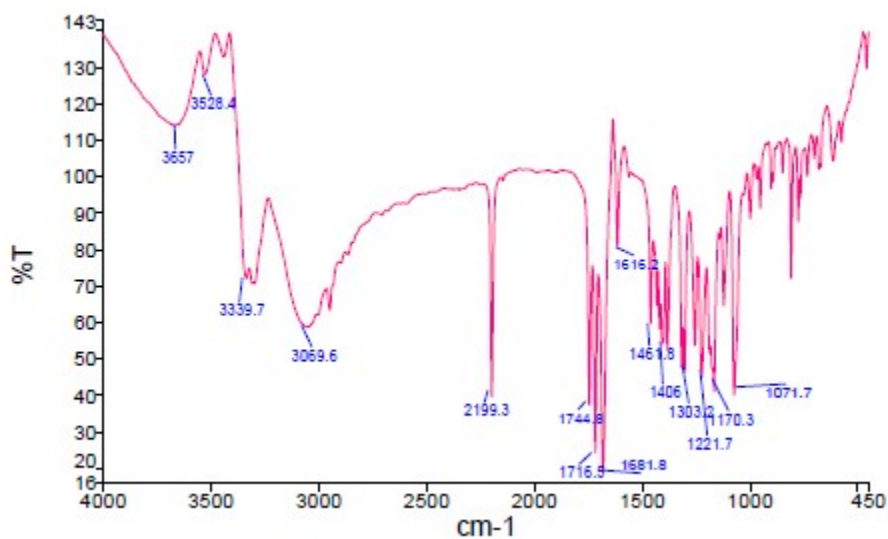

Figure S2: FTIR spectrum of derivative **4a**

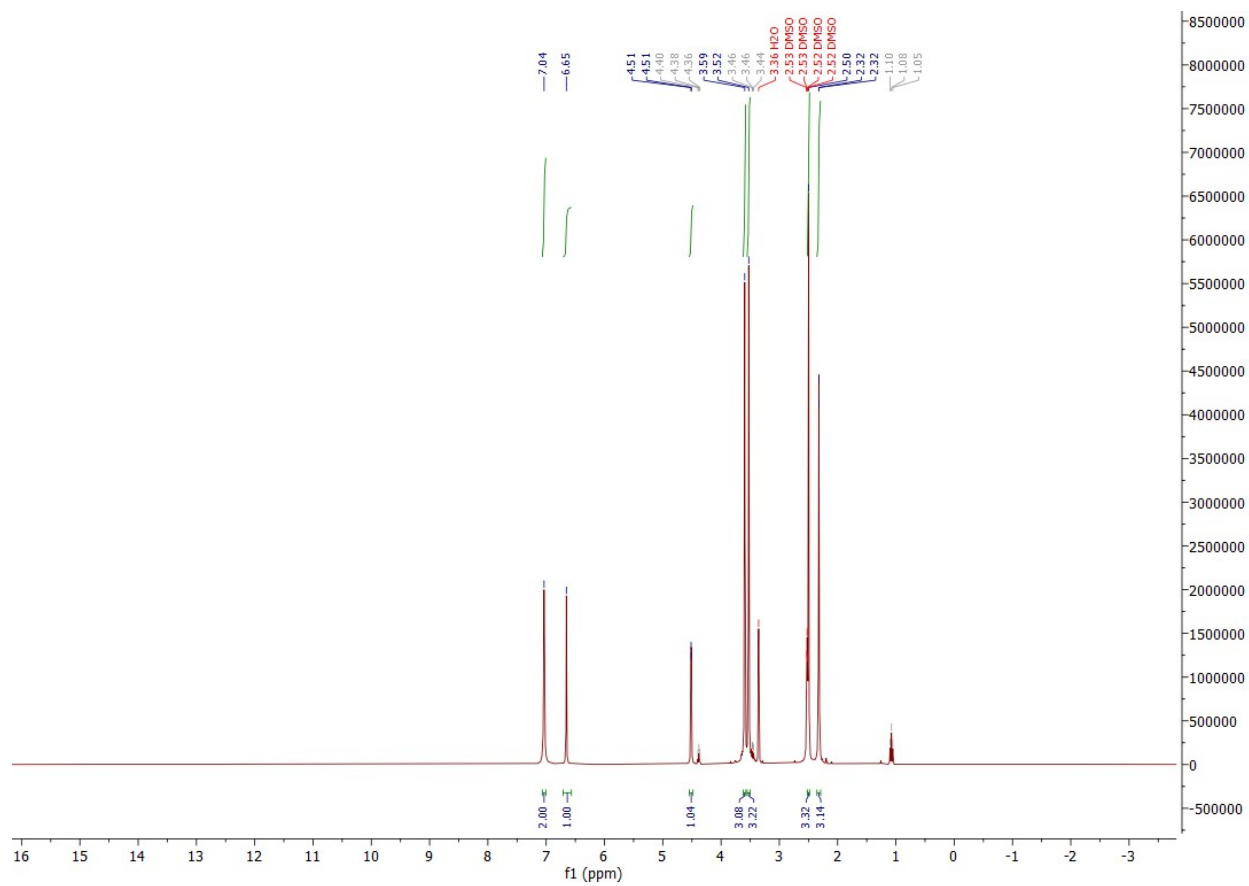

**Figure S3:** <sup>1</sup>H NMR spectrum of derivative **4a**

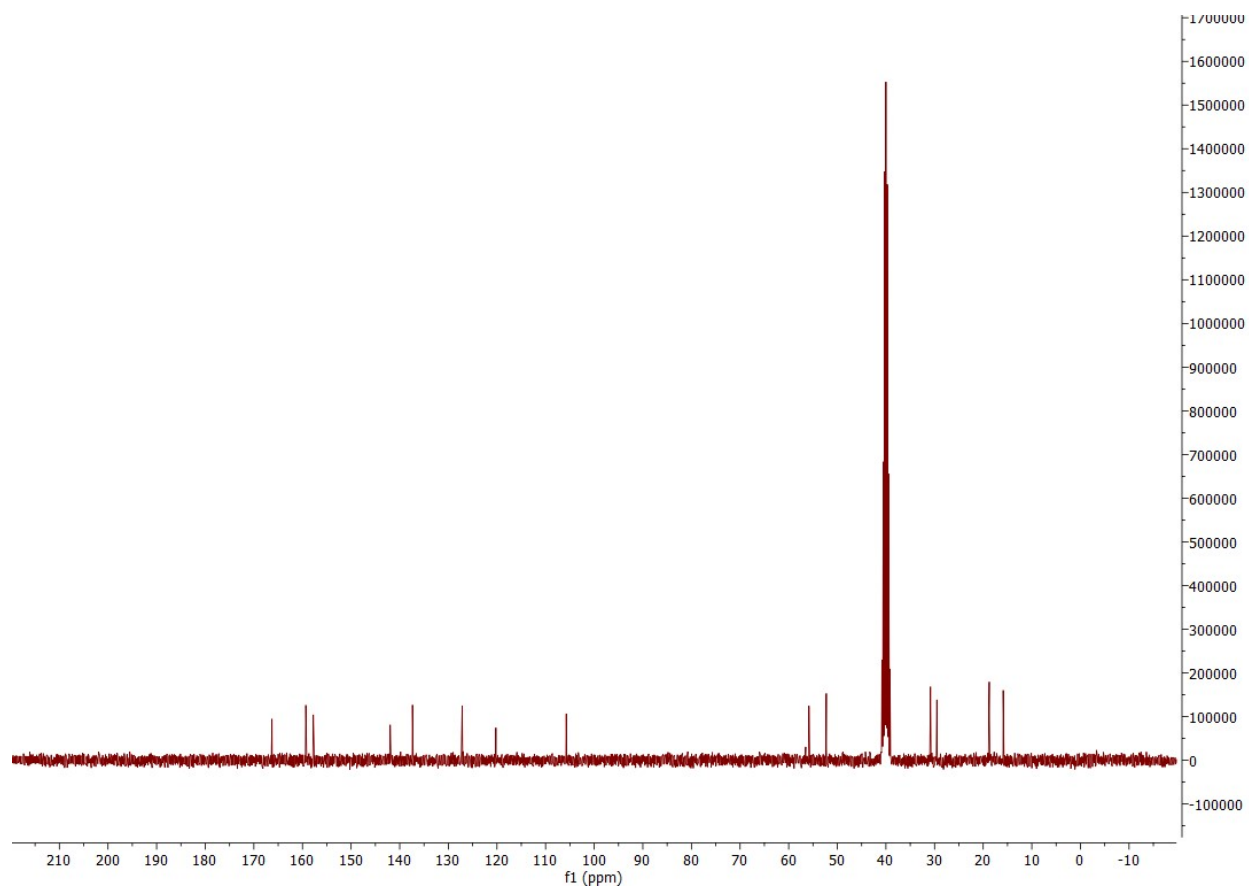

**Figure S4:**  $^{13}\text{C}$ NMR spectrum of derivative **4a**

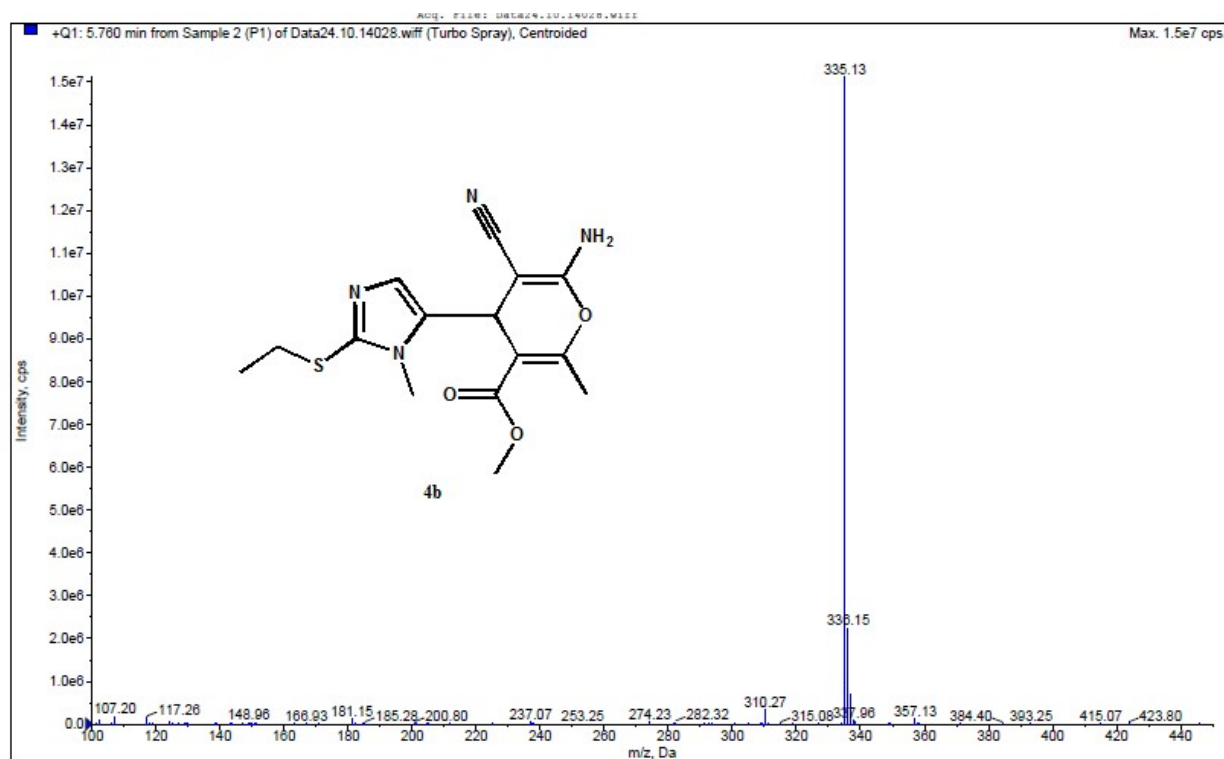

Figure S5: Mass spectrum of derivative **4b**

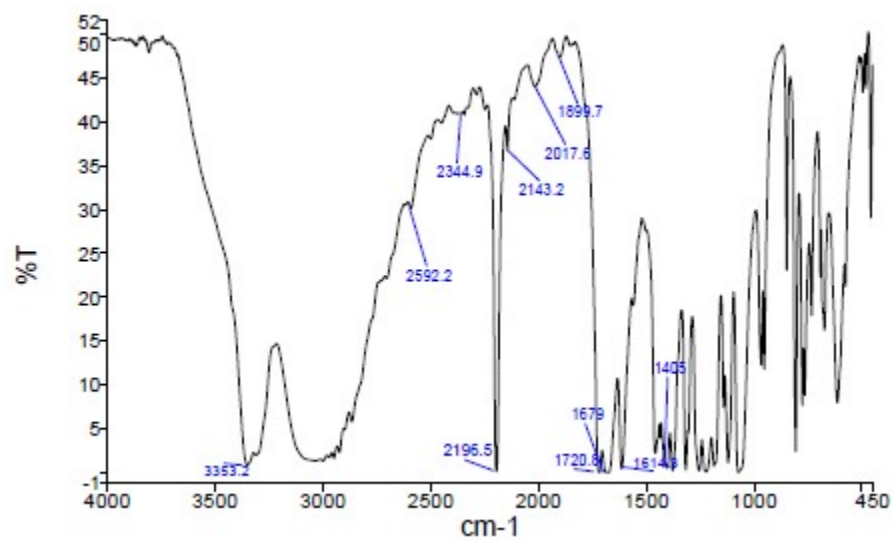

Figure S6: FTIR spectrum of derivative **4b**

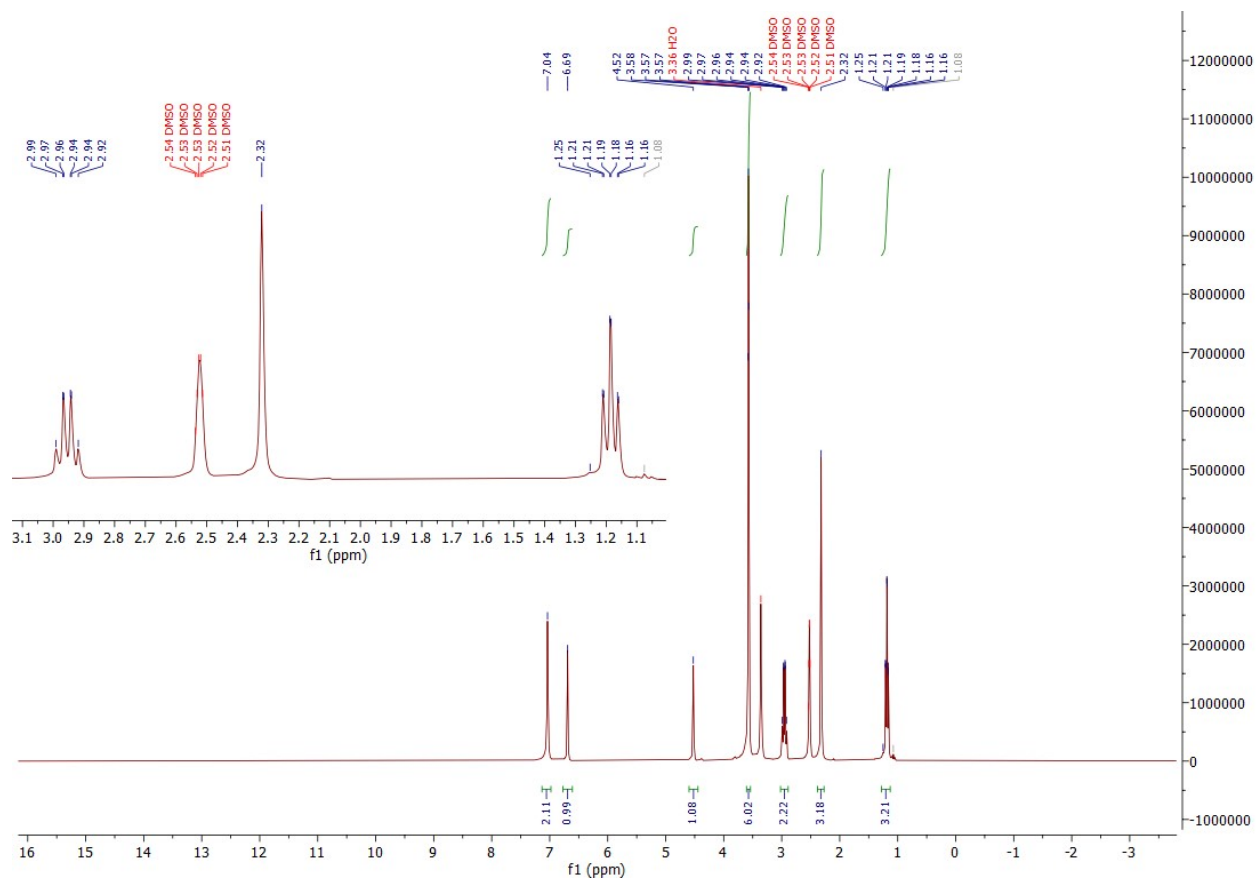

**Figure S7:** <sup>1</sup>H NMR spectrum of derivative **4b**

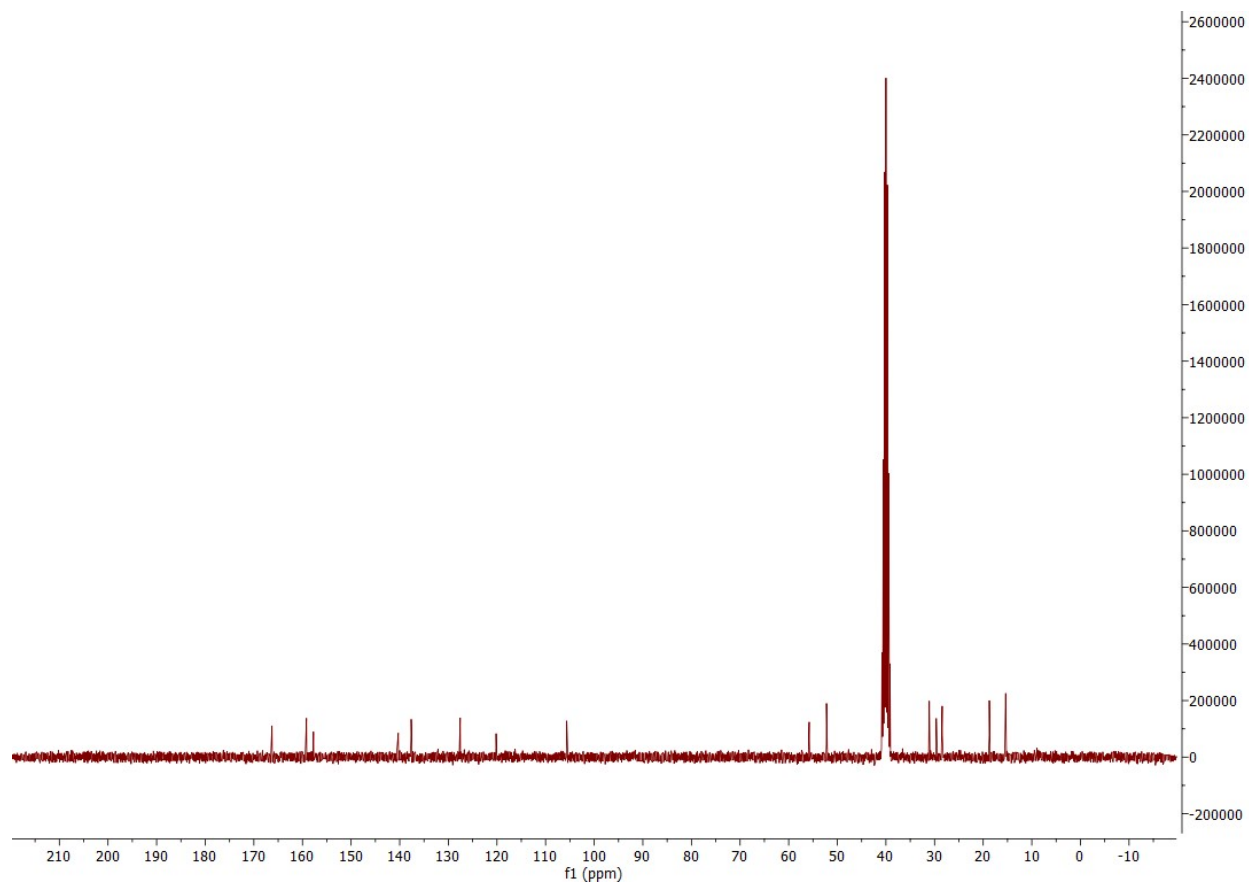

**Figure S8:**  $^{13}\text{C}$ NMR spectrum of derivative **4b**

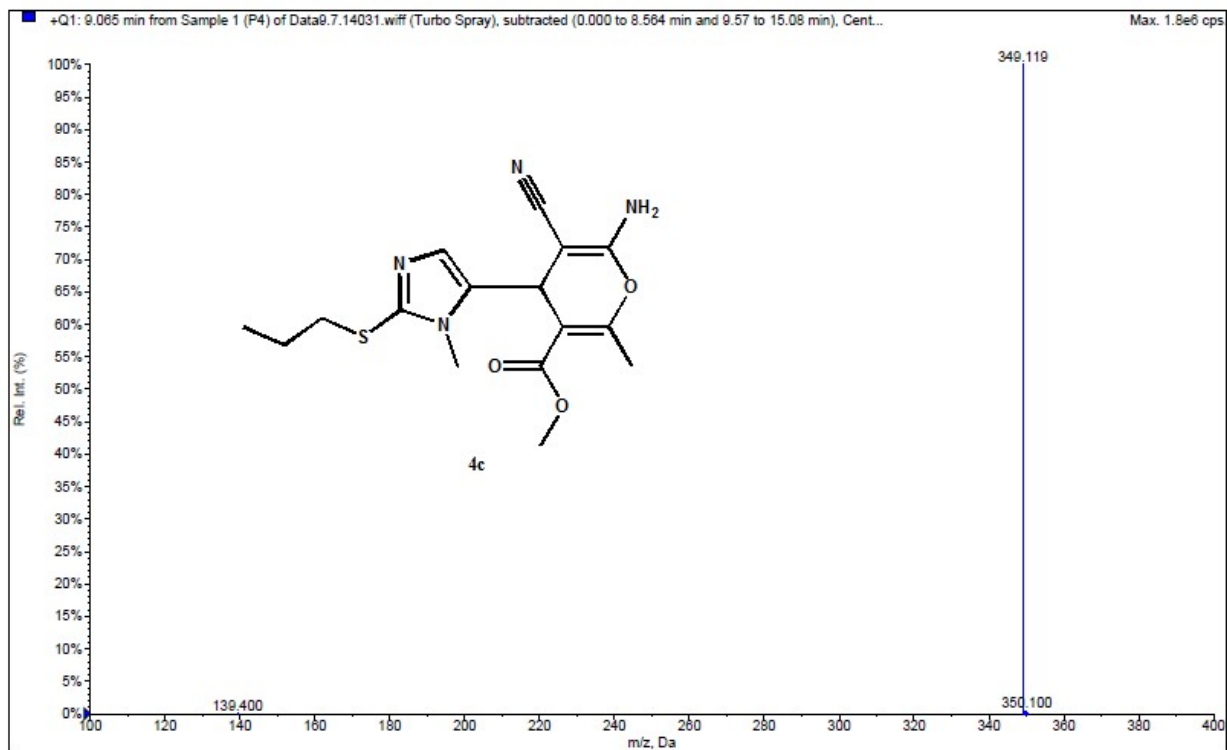

Figure S9: Mass spectrum of derivative 4c

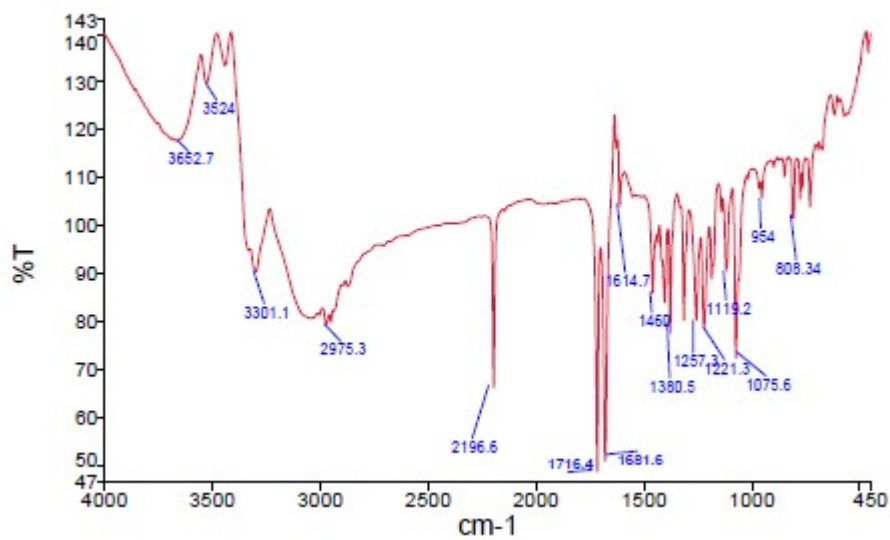

Figure S10: FTIR spectrum of derivative 4c

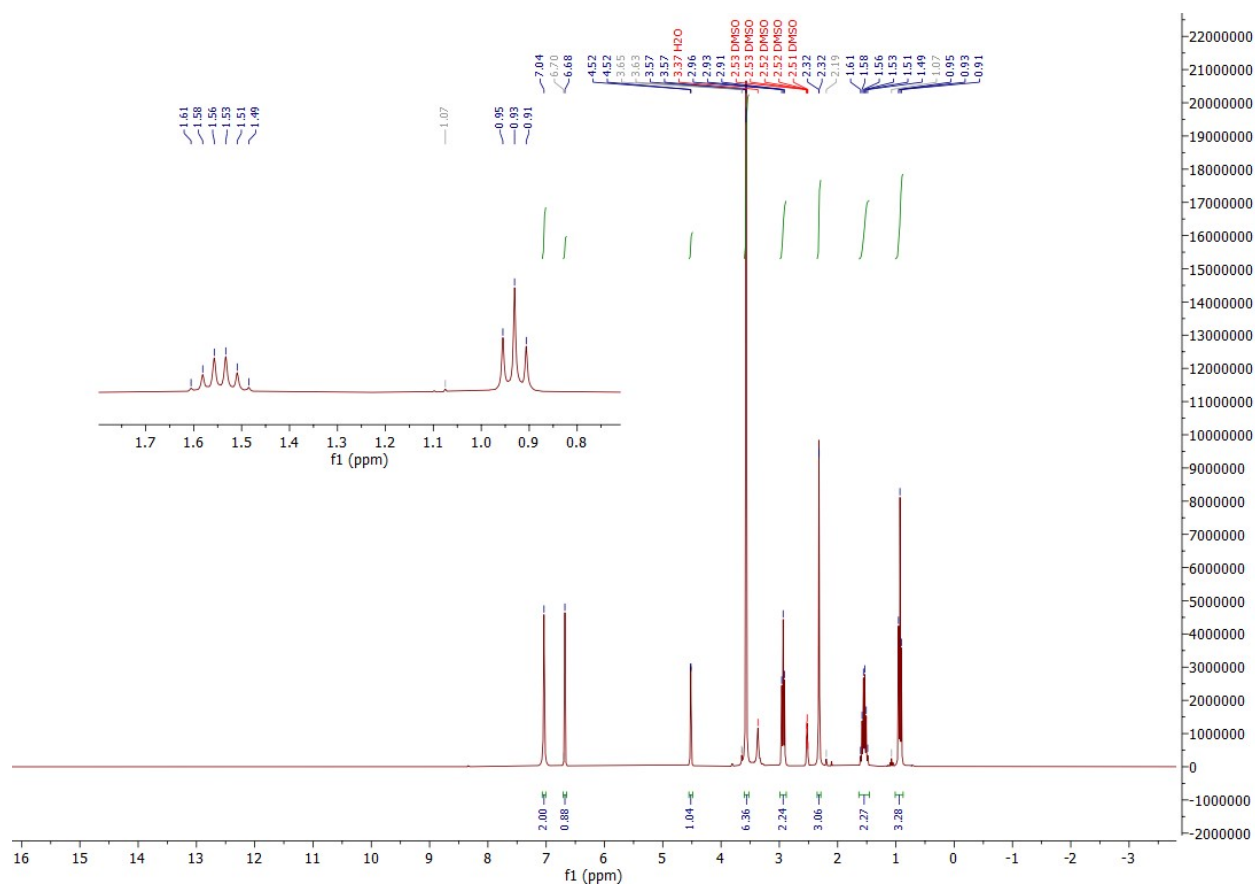

**Figure S11:** <sup>1</sup>H NMR spectrum of derivative **4c**



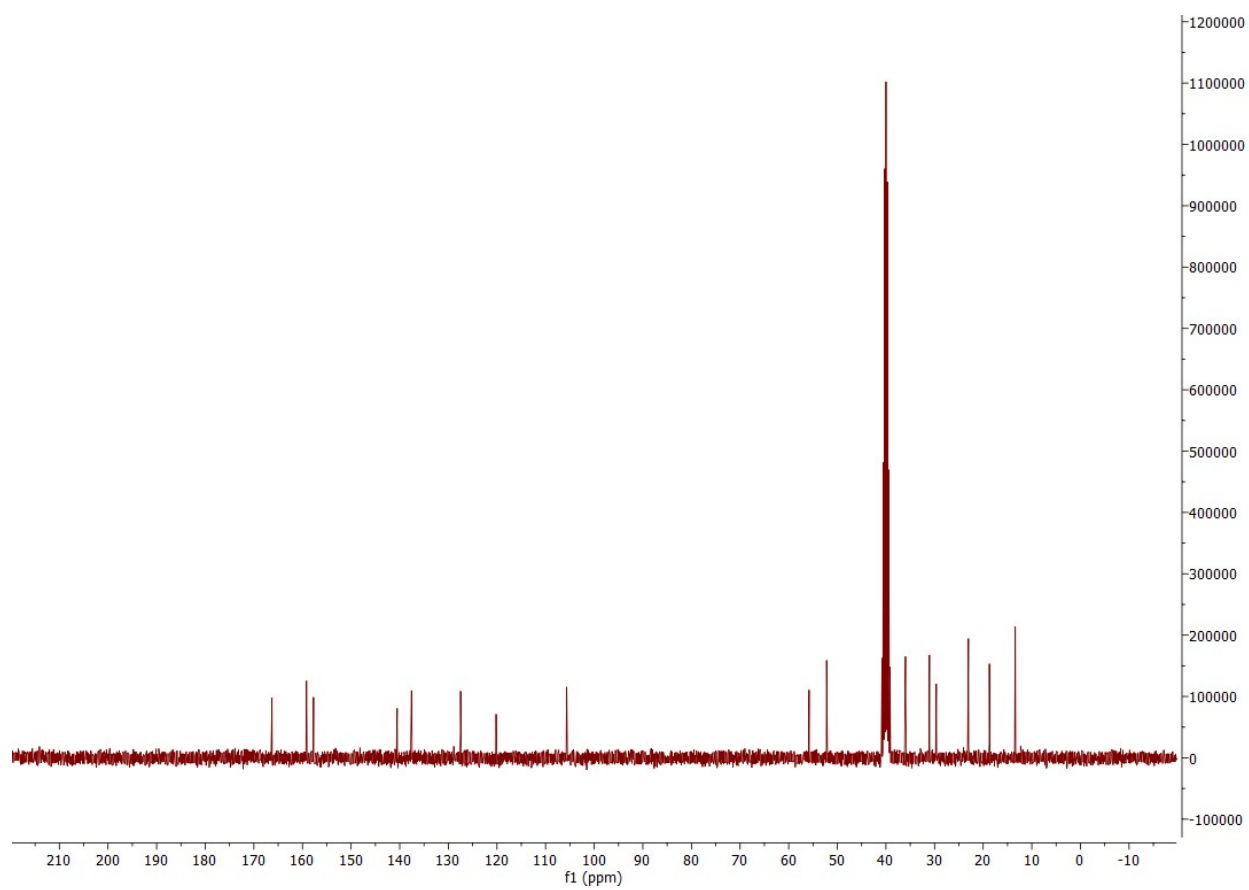

**Figure S12:**  $^{13}\text{C}$ NMR spectrum of derivative **4c**

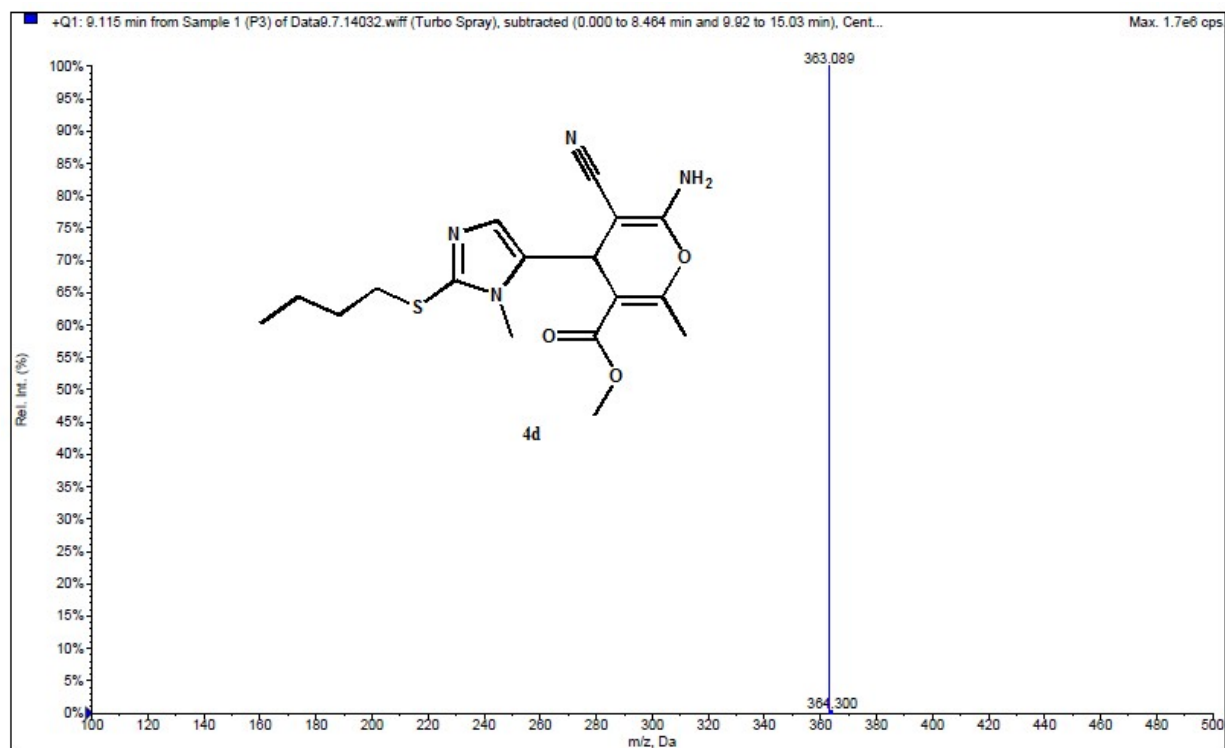

Figure S13: Mass spectrum of derivative 4d

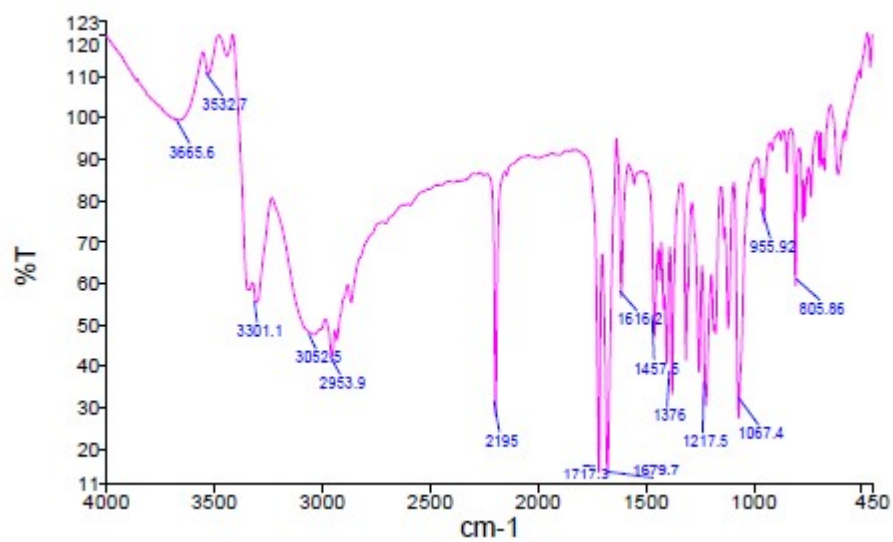

Figure S14: FTIR spectrum of derivative 4d

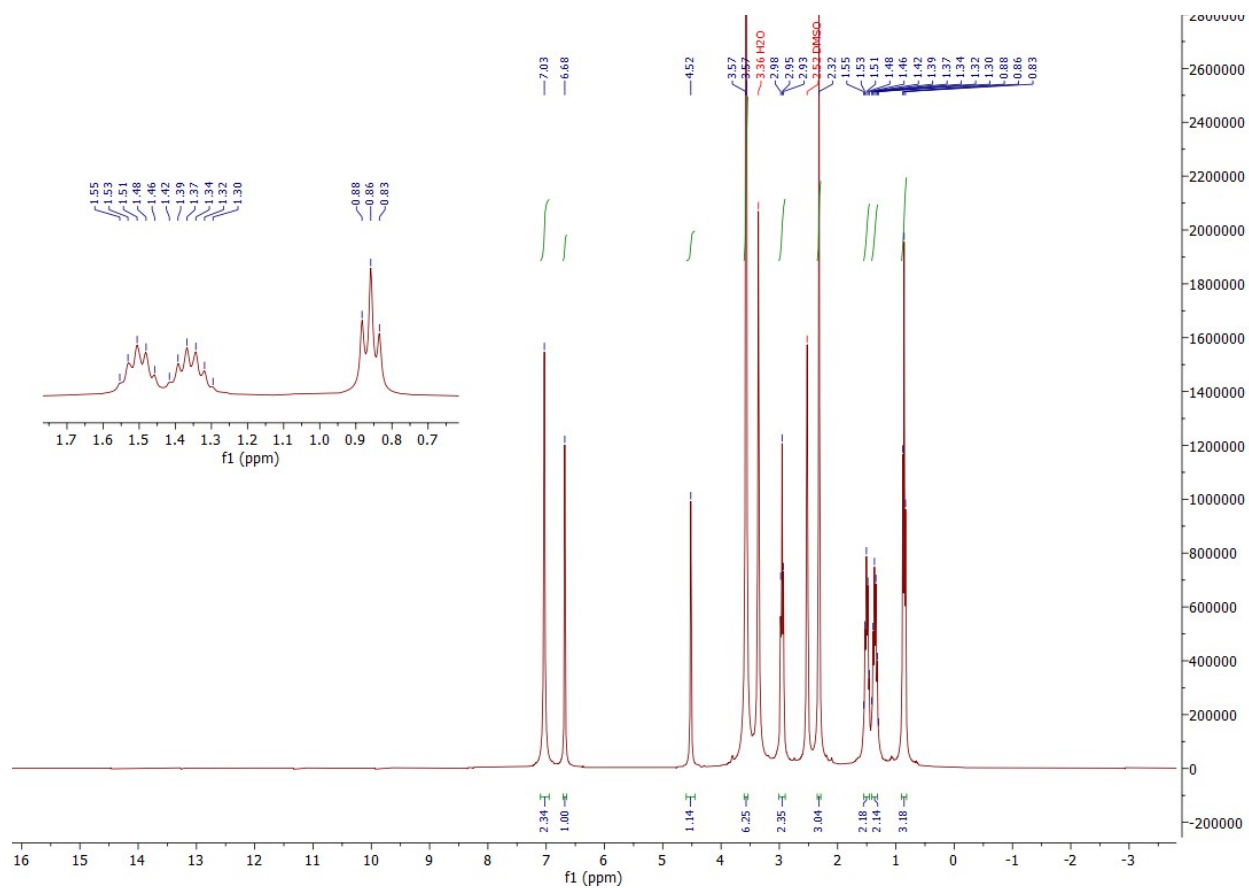

**Figure S15:**  $^1\text{H}$ NMR spectrum of derivative **4d**

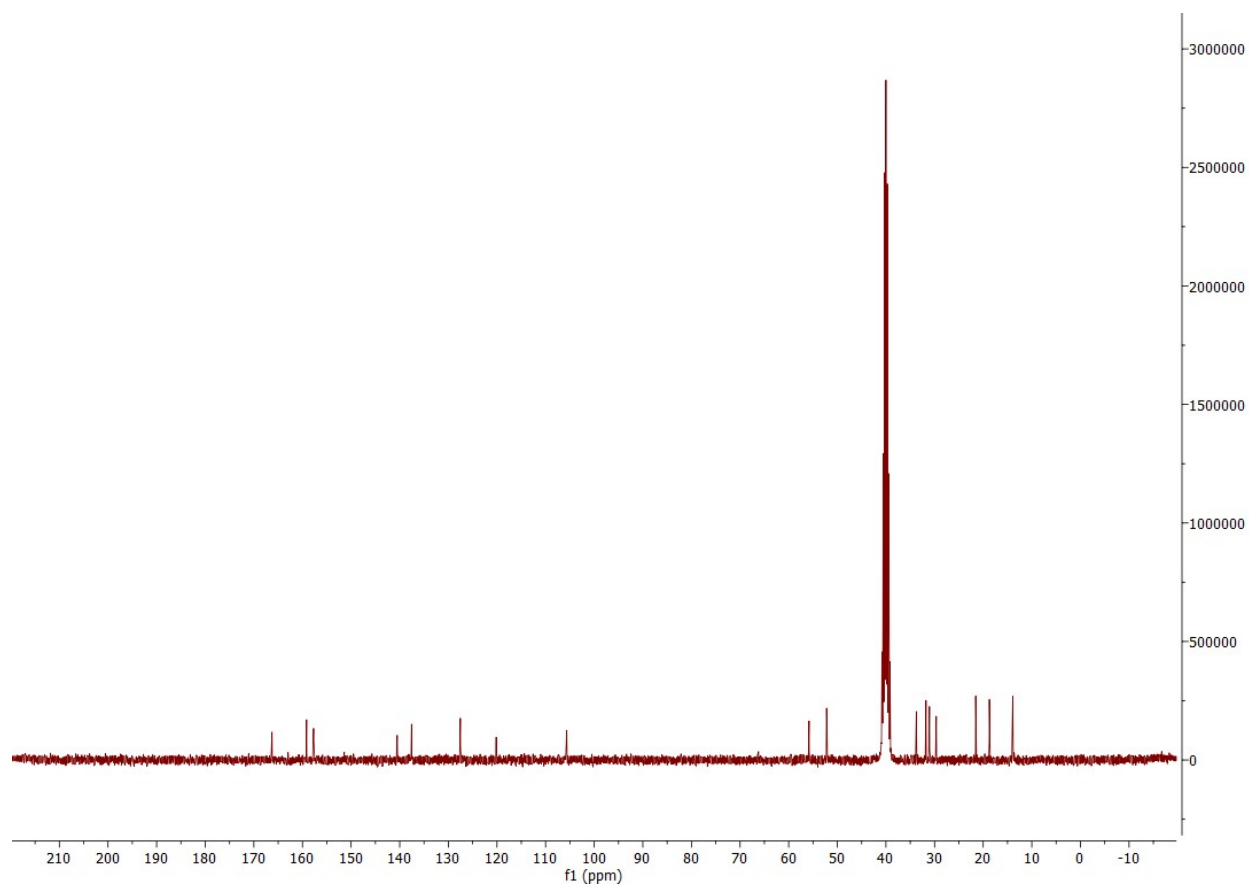

**Figure S16:**  $^{13}\text{C}$ NMR spectrum of derivative **4d**

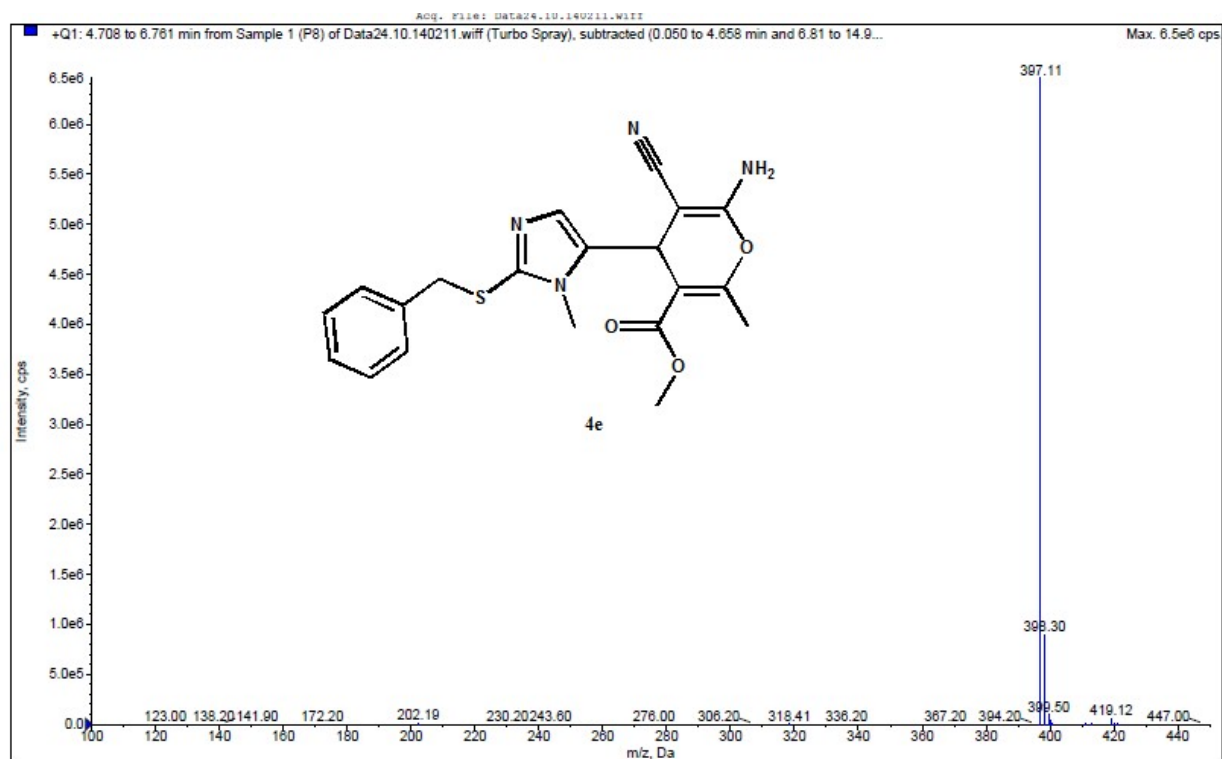

Figure S17: Mass spectrum of derivative 4e

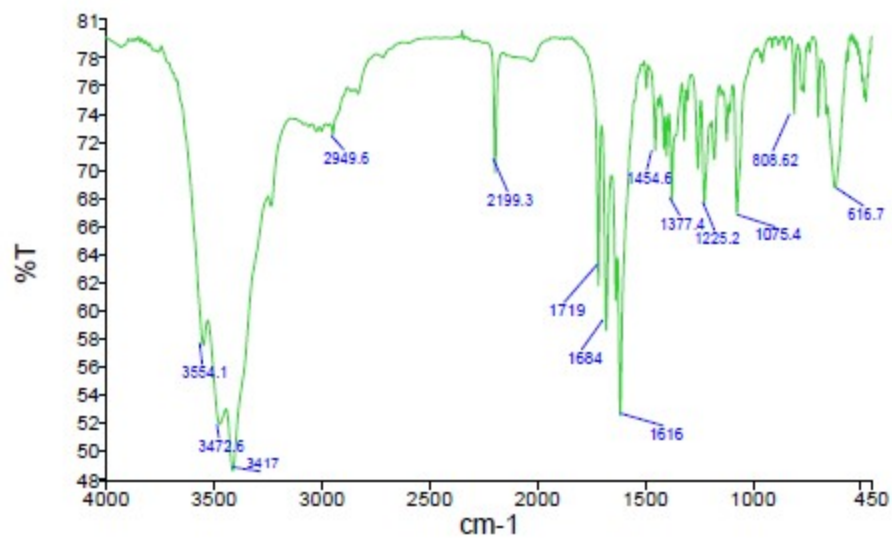

Figure S18: FTIR spectrum of derivative 4e

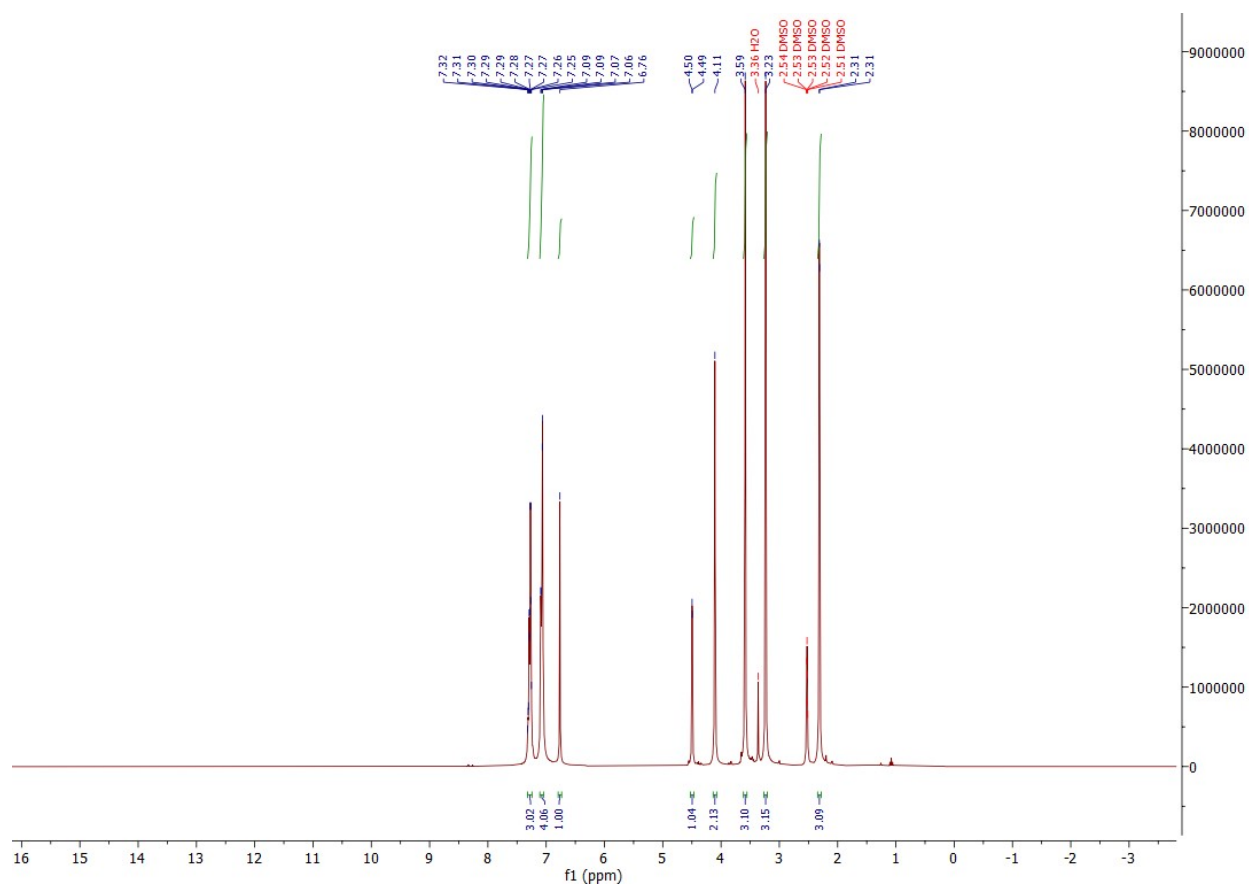

**Figure S19:** <sup>1</sup>H NMR spectrum of derivative **4e**

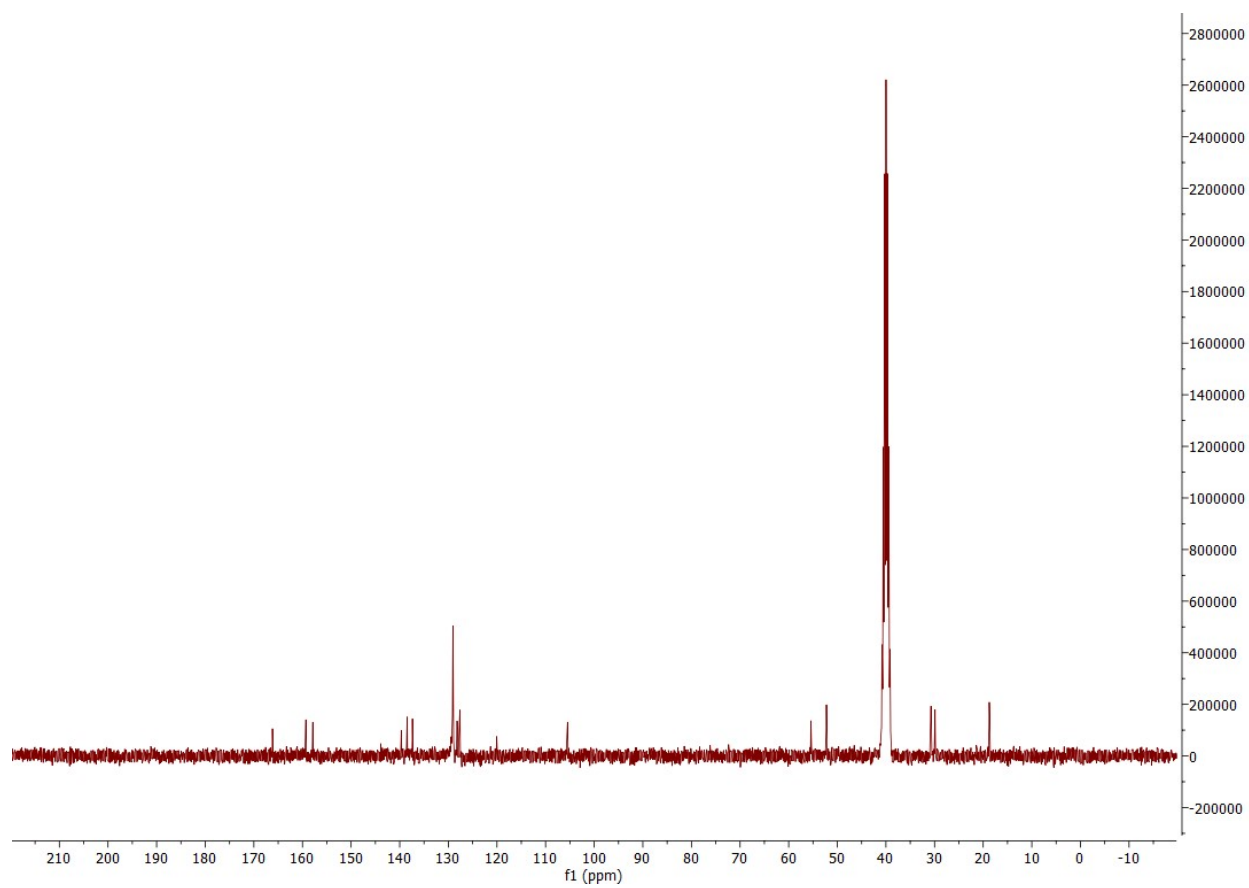

**Figure S20:**  $^{13}\text{C}$ NMR spectrum of derivative **4e**

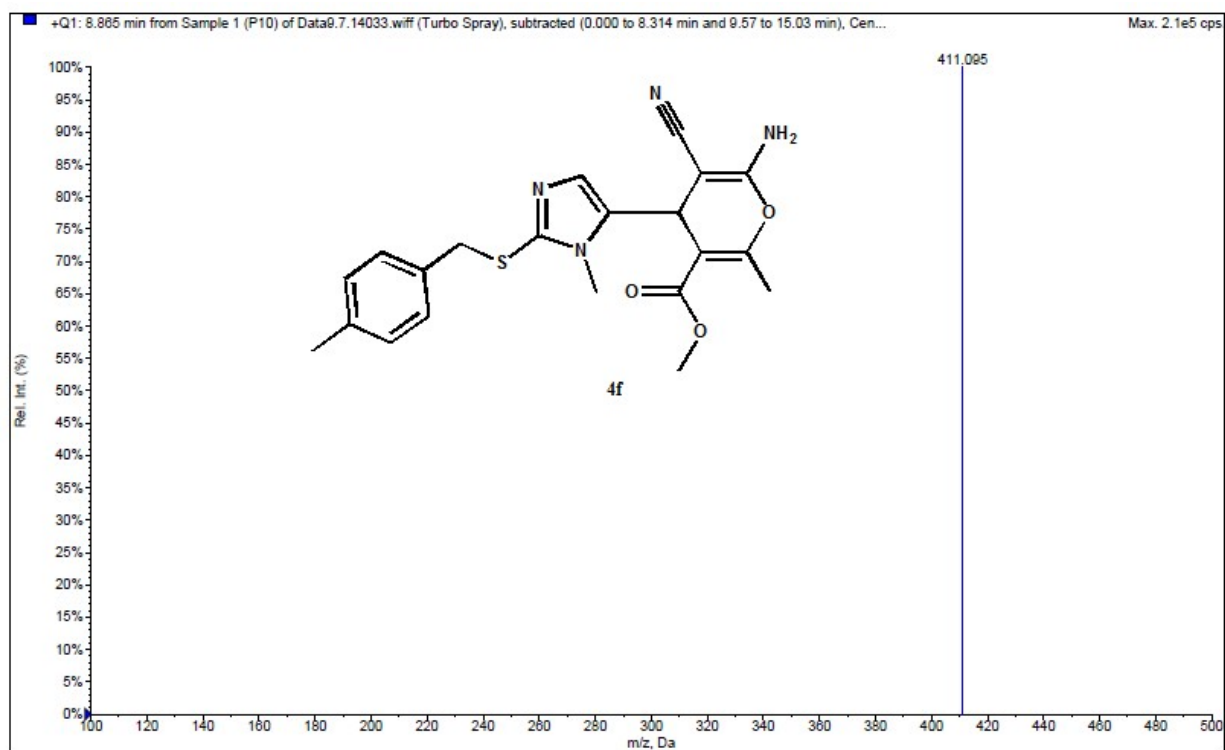

Figure S21: Mass spectrum of derivative 4f

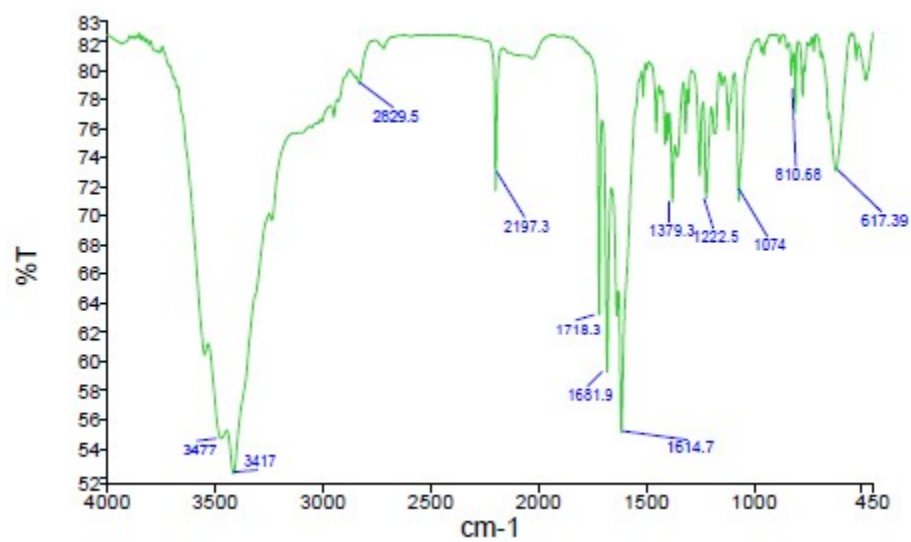

Figure S22: FTIR spectrum of derivative 4f



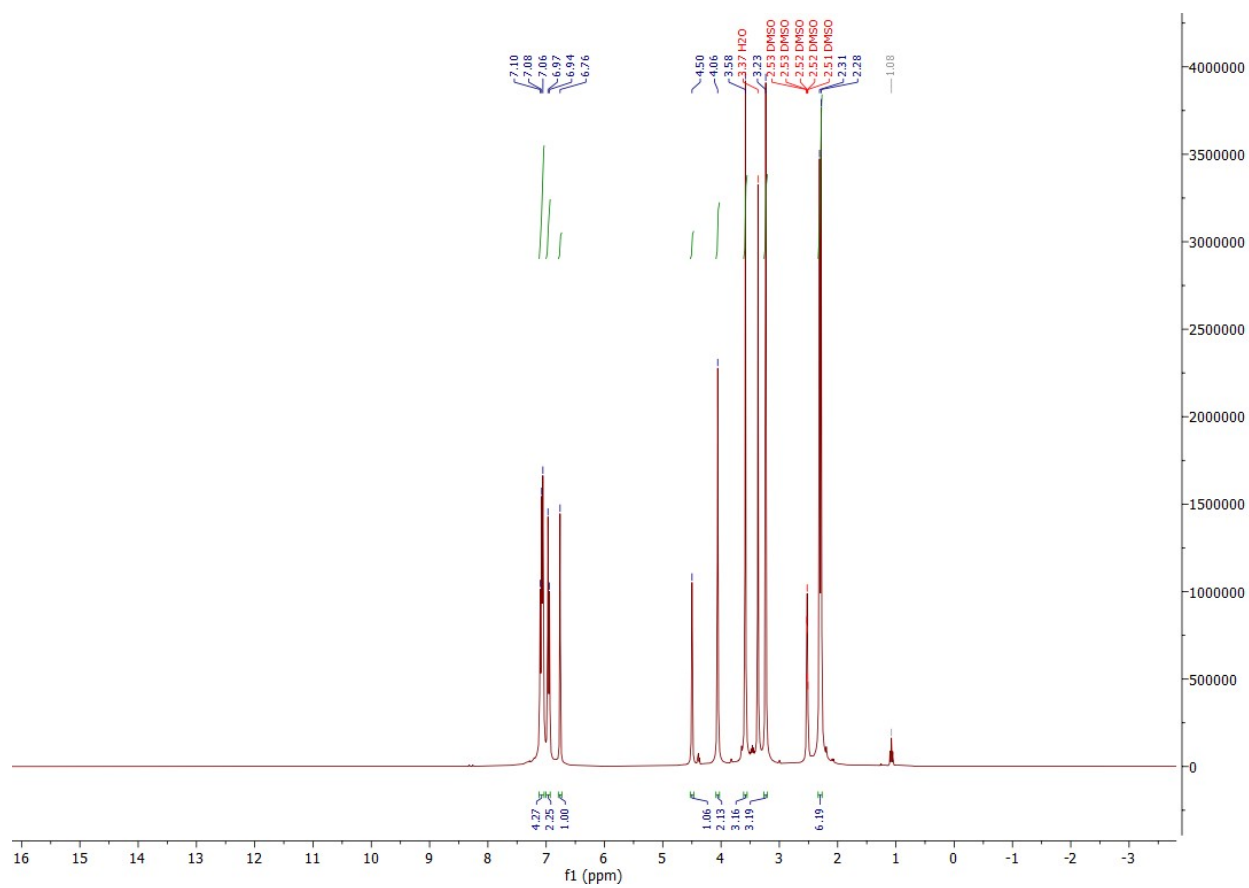

**Figure S23:** <sup>1</sup>H NMR spectrum of derivative **4f**

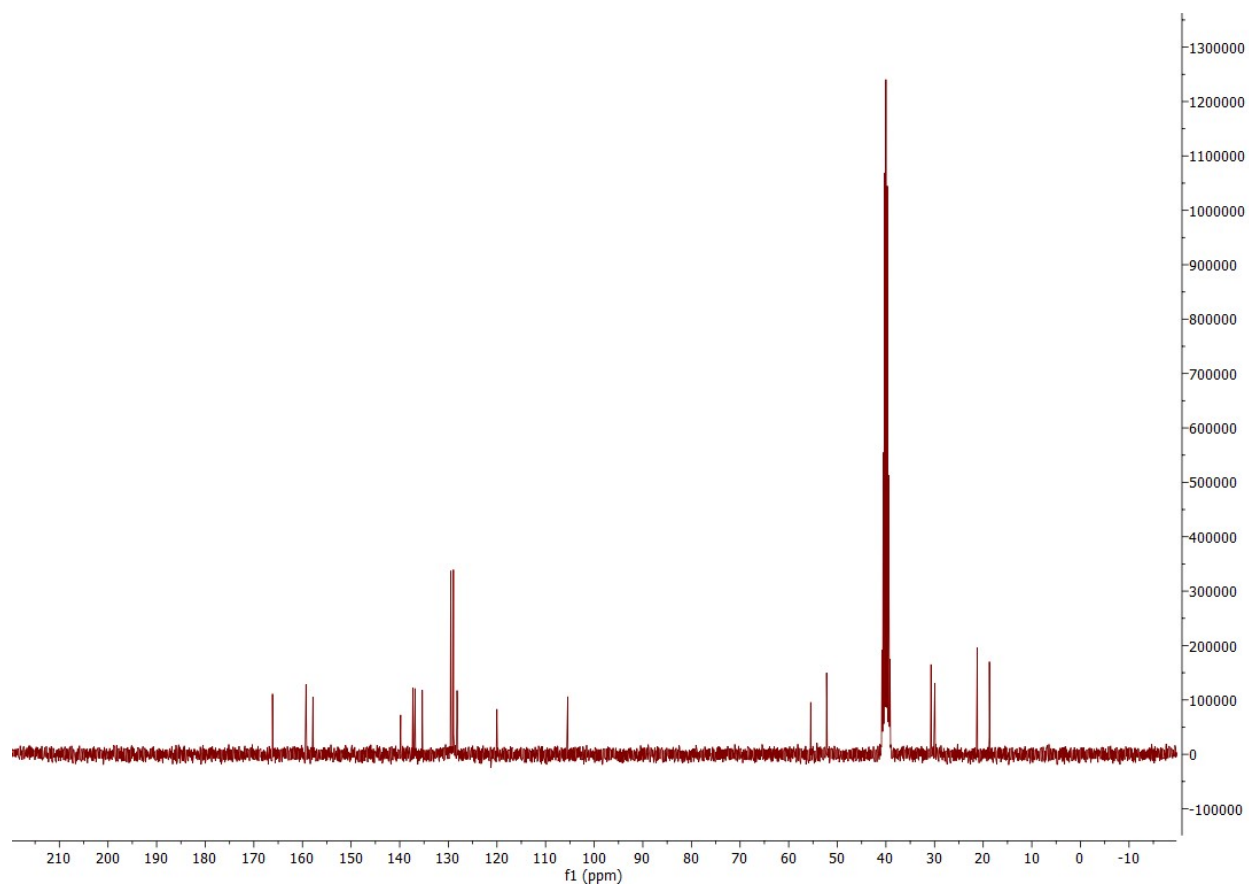

**Figure S24:**  $^{13}\text{C}$ NMR spectrum of derivative **4f**

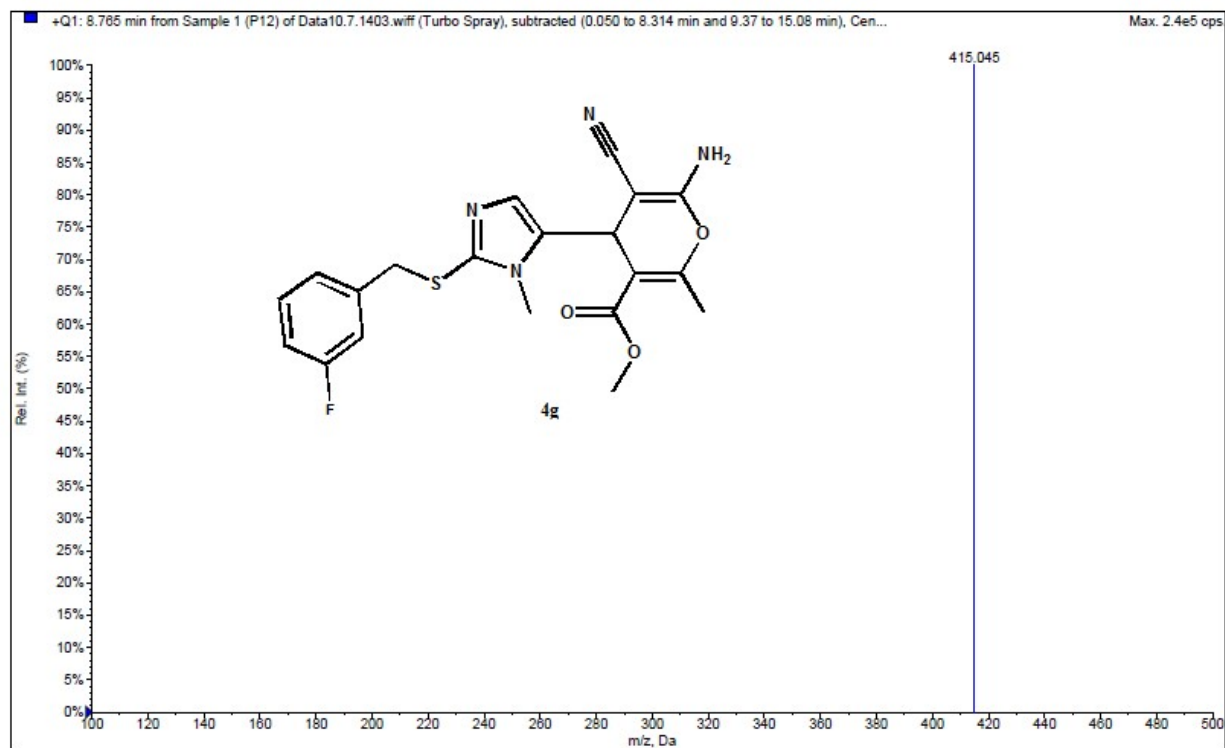

Figure S25: Mass spectrum of derivative 4g

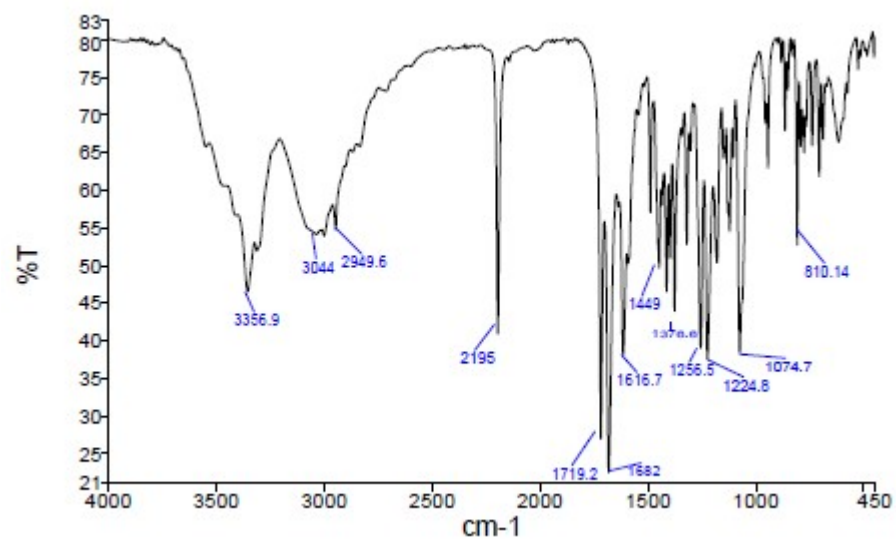

Figure S26: FTIR spectrum of derivative 4g

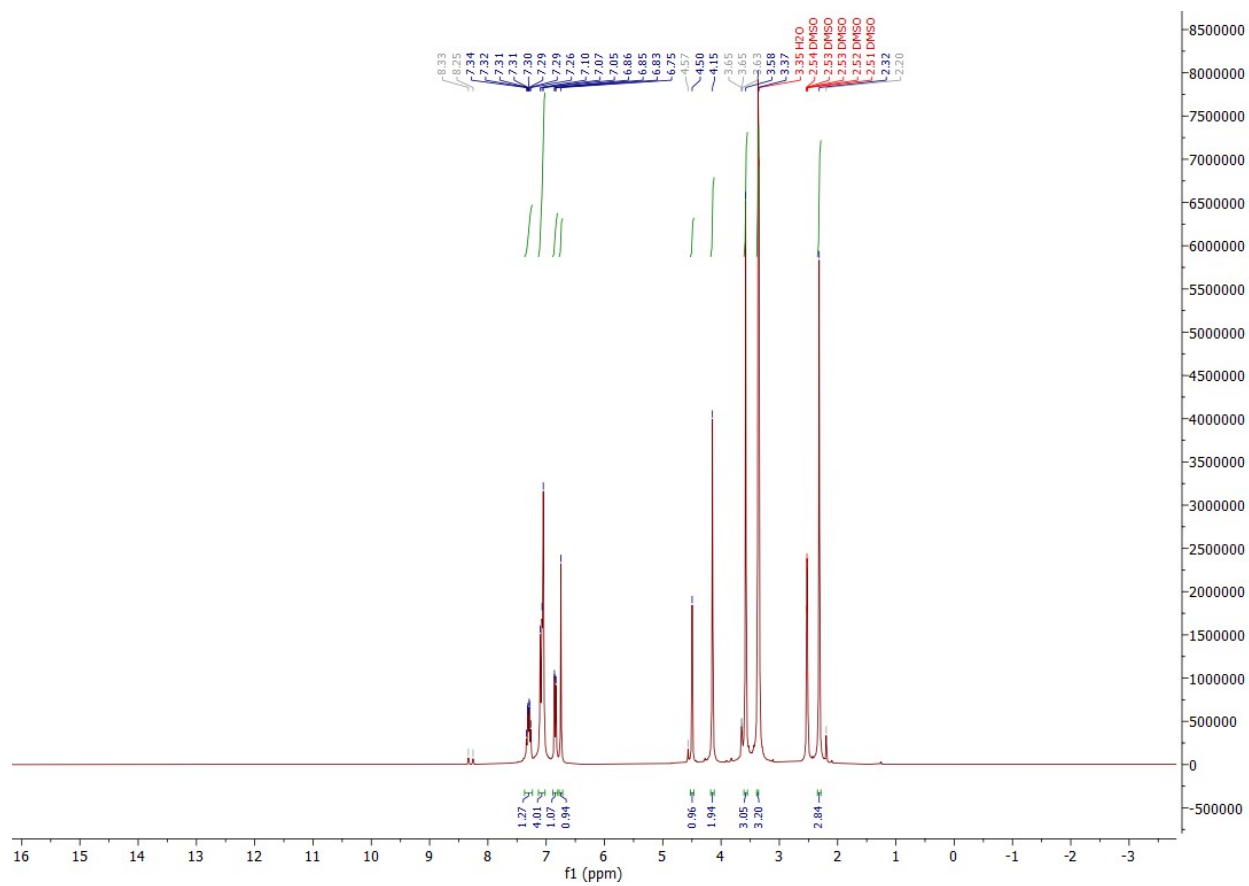

**Figure S27:** <sup>1</sup>H NMR spectrum of derivative **4g**

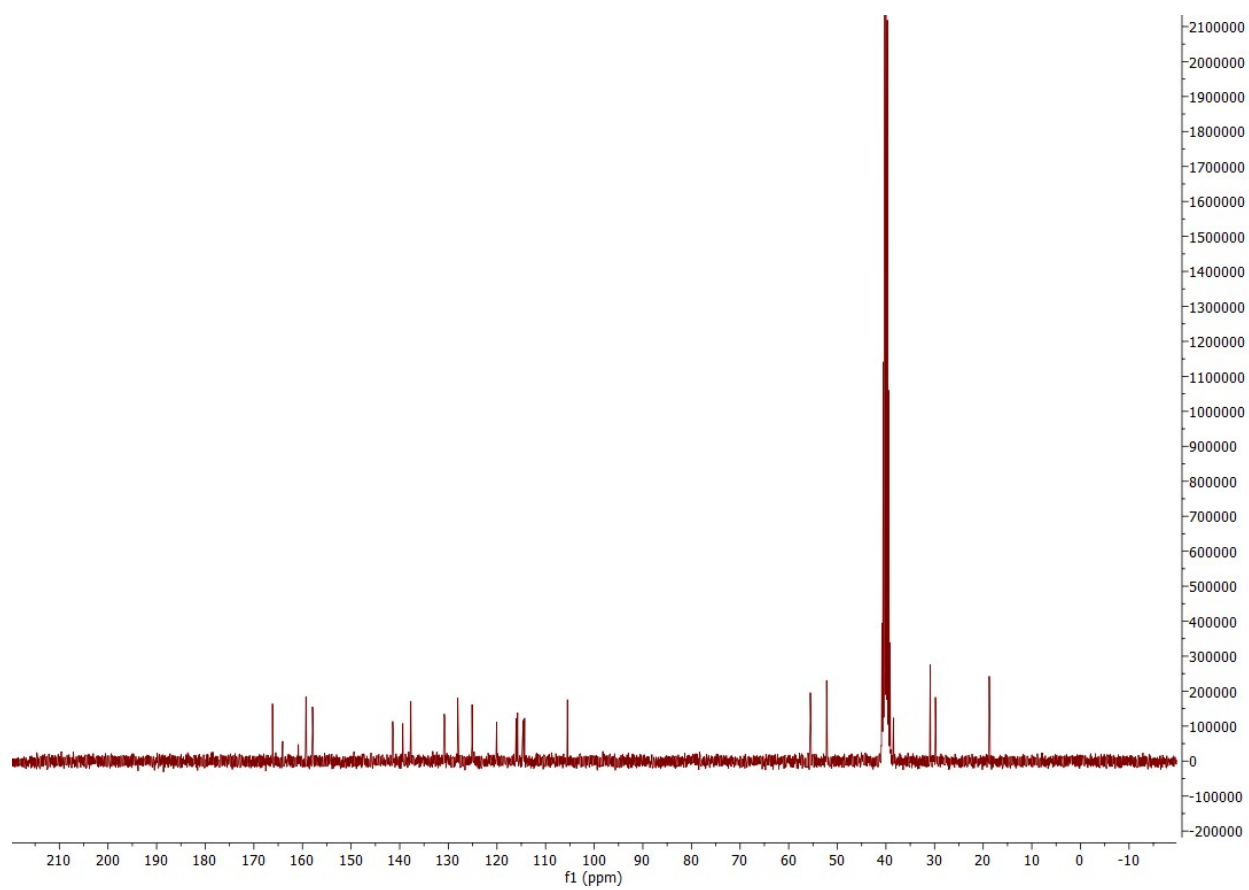

**Figure S28:**  $^{13}\text{C}$ NMR spectrum of derivative **4g**

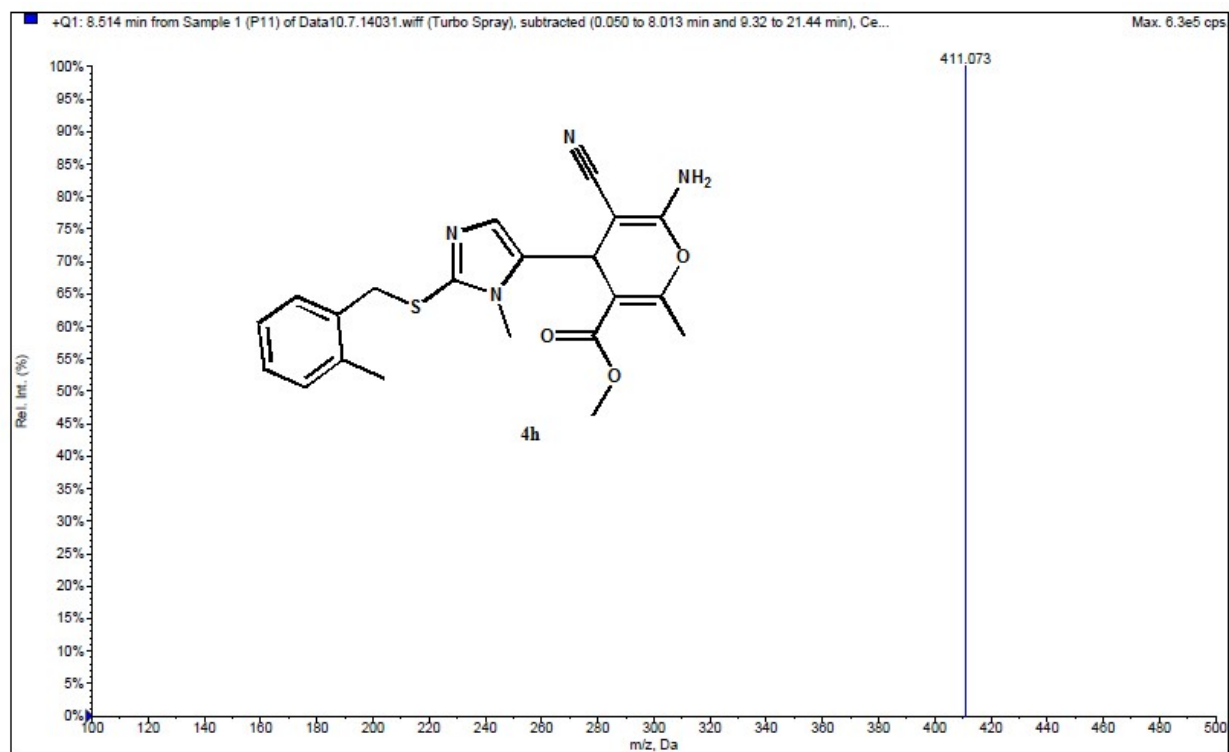

**Figure S29:** Mass spectrum of derivative **4h**

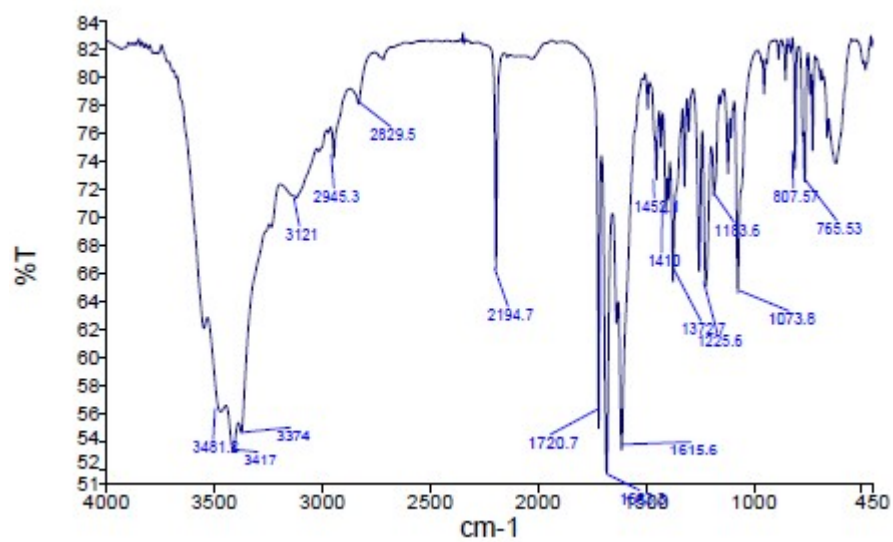

**Figure S30:** FTIR spectrum of derivative **4h**

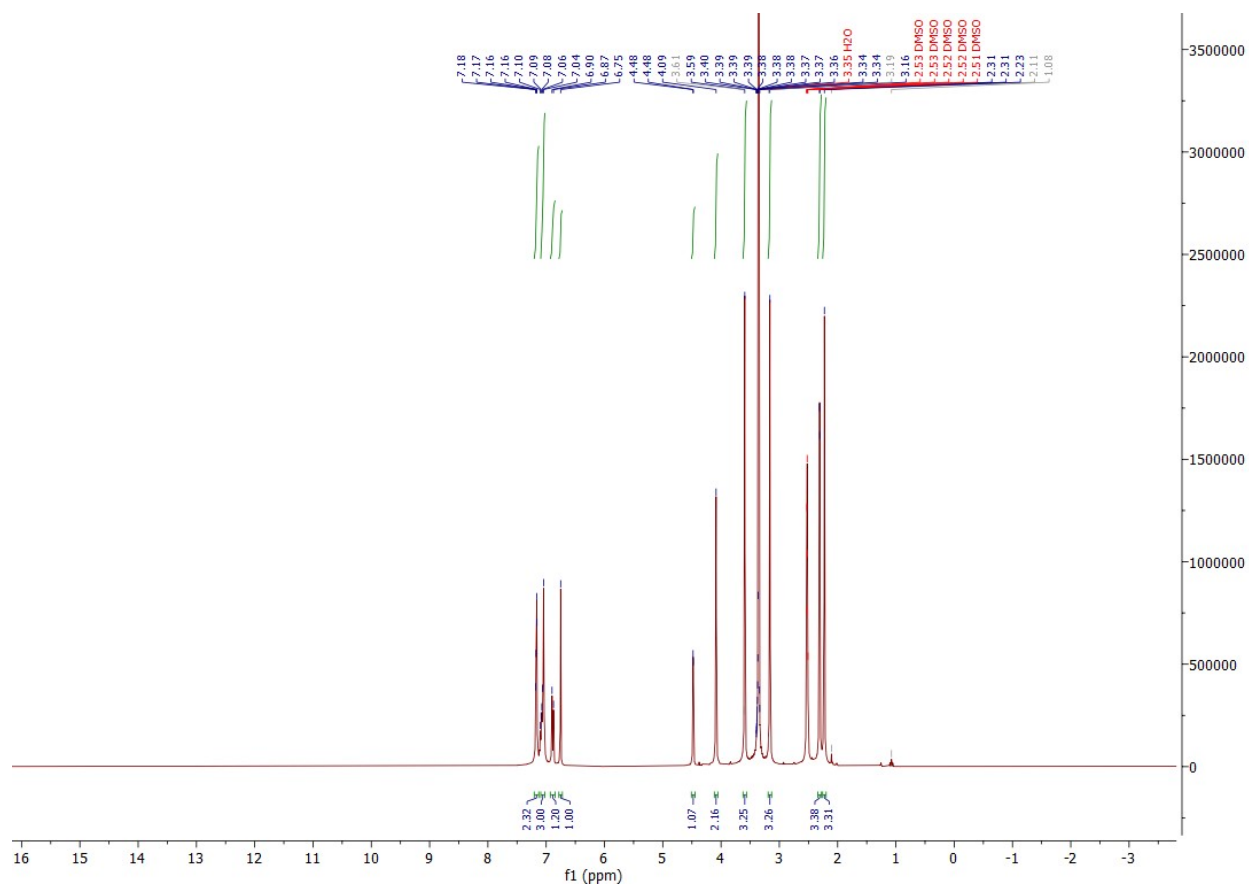

**Figure S31:** <sup>1</sup>H NMR spectrum of derivative **4h**

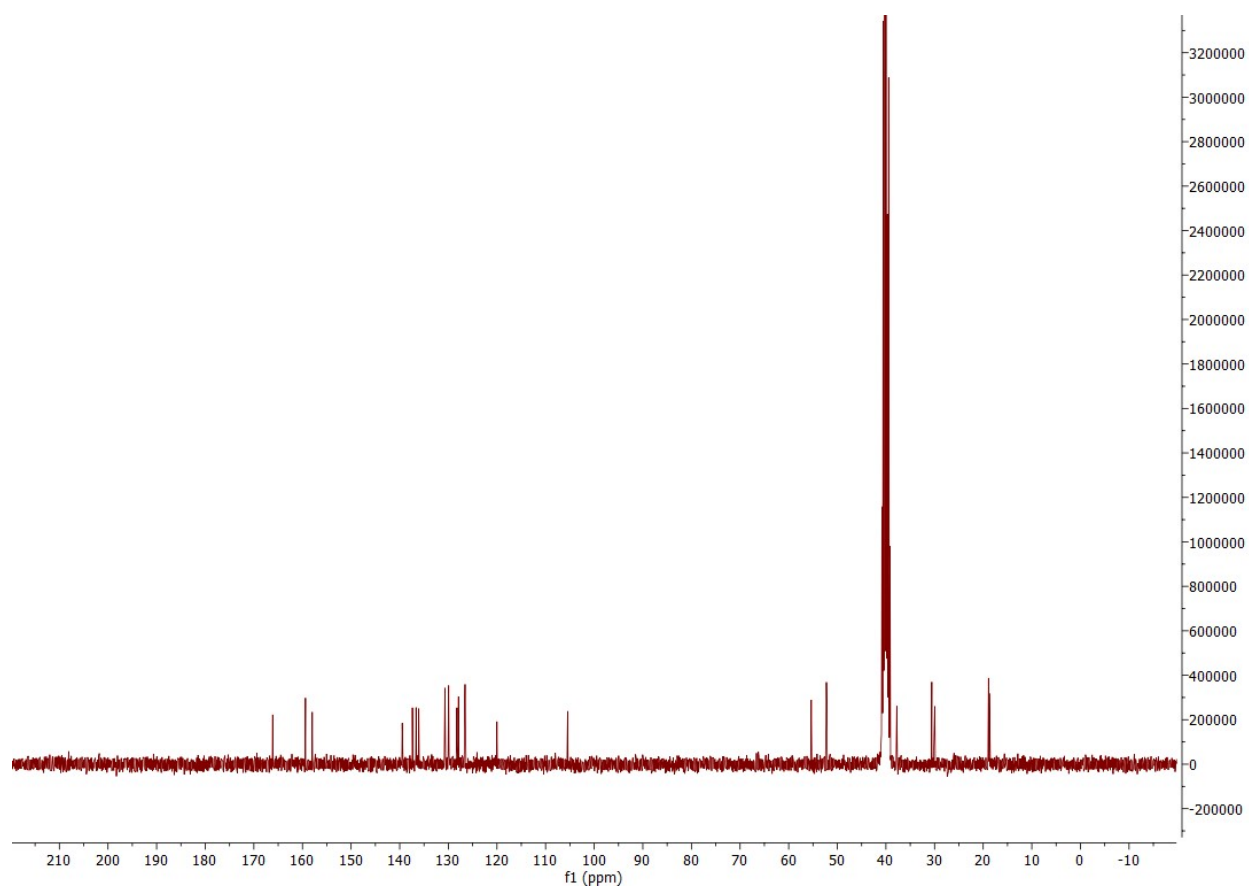

**Figure S32:**  $^{13}\text{C}$ NMR spectrum of derivative **4h**



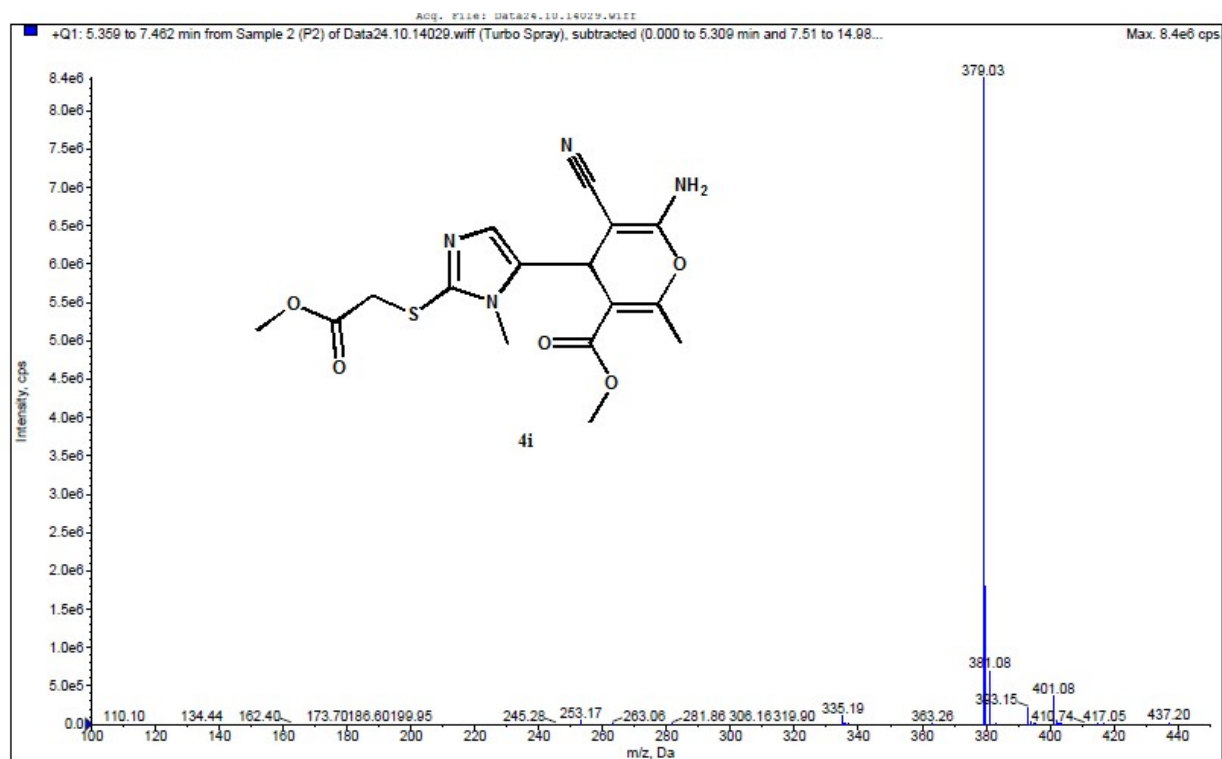

**Figure S33:** Mass spectrum of derivative **4i**

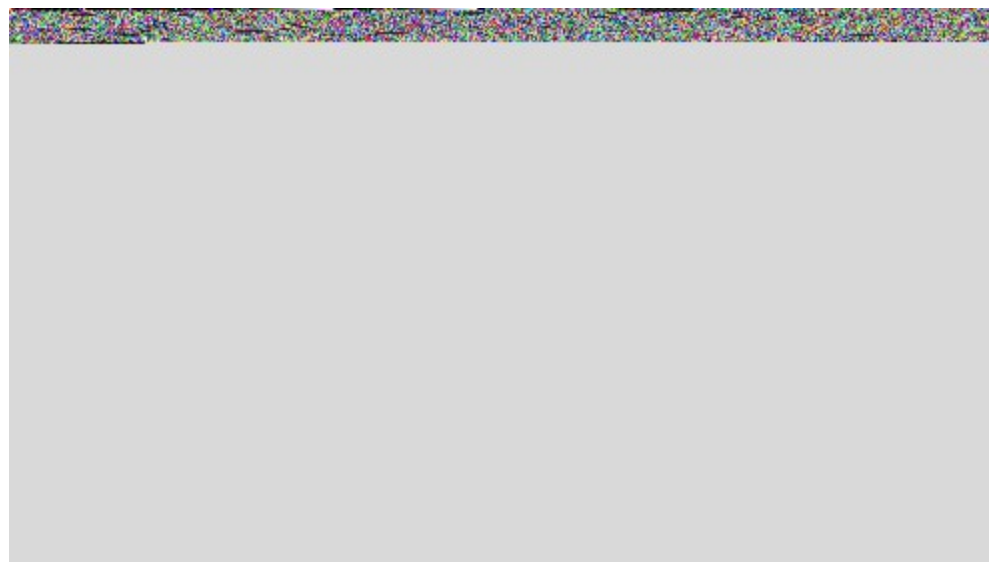

**Figure S34:** FTIR spectrum of derivative **4i**

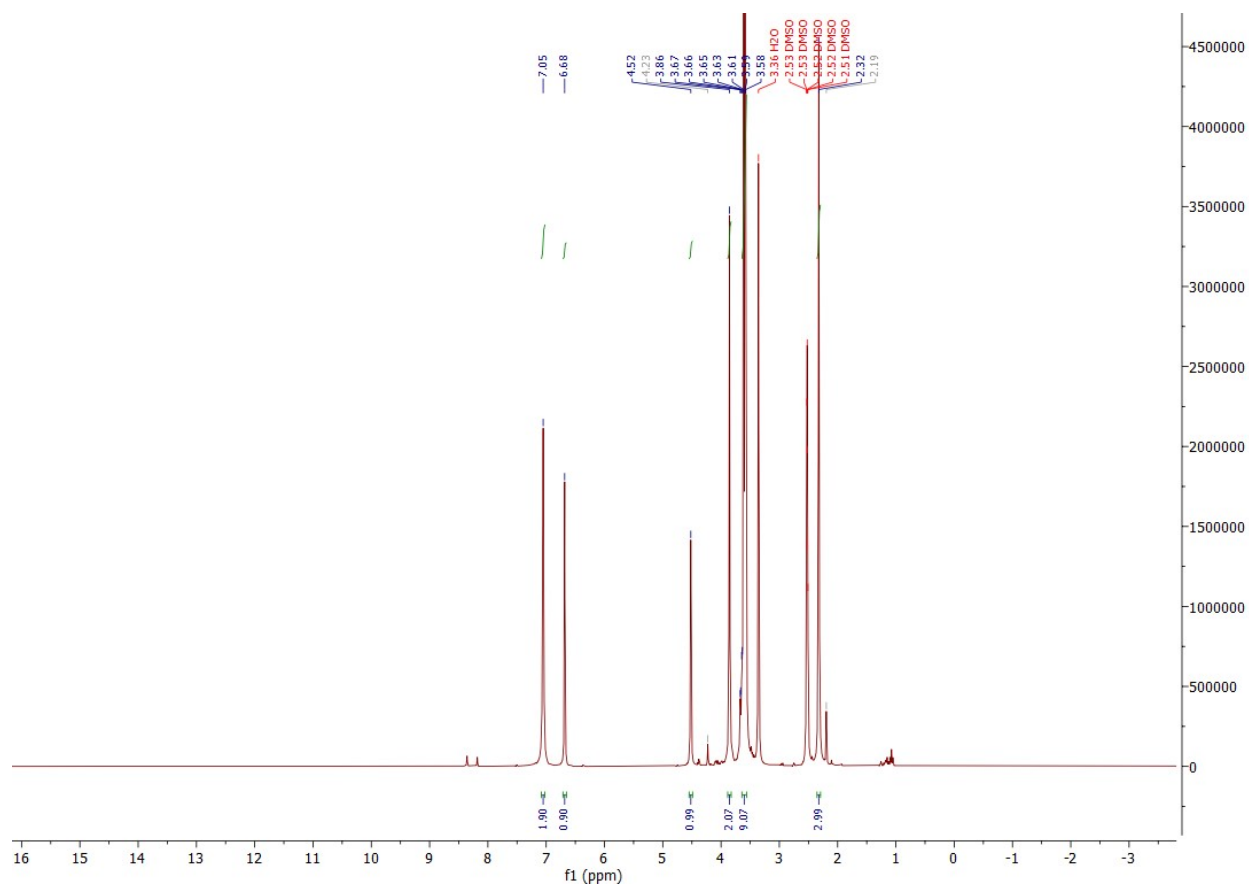

**Figure S35:** <sup>1</sup>H NMR spectrum of derivative **4i**

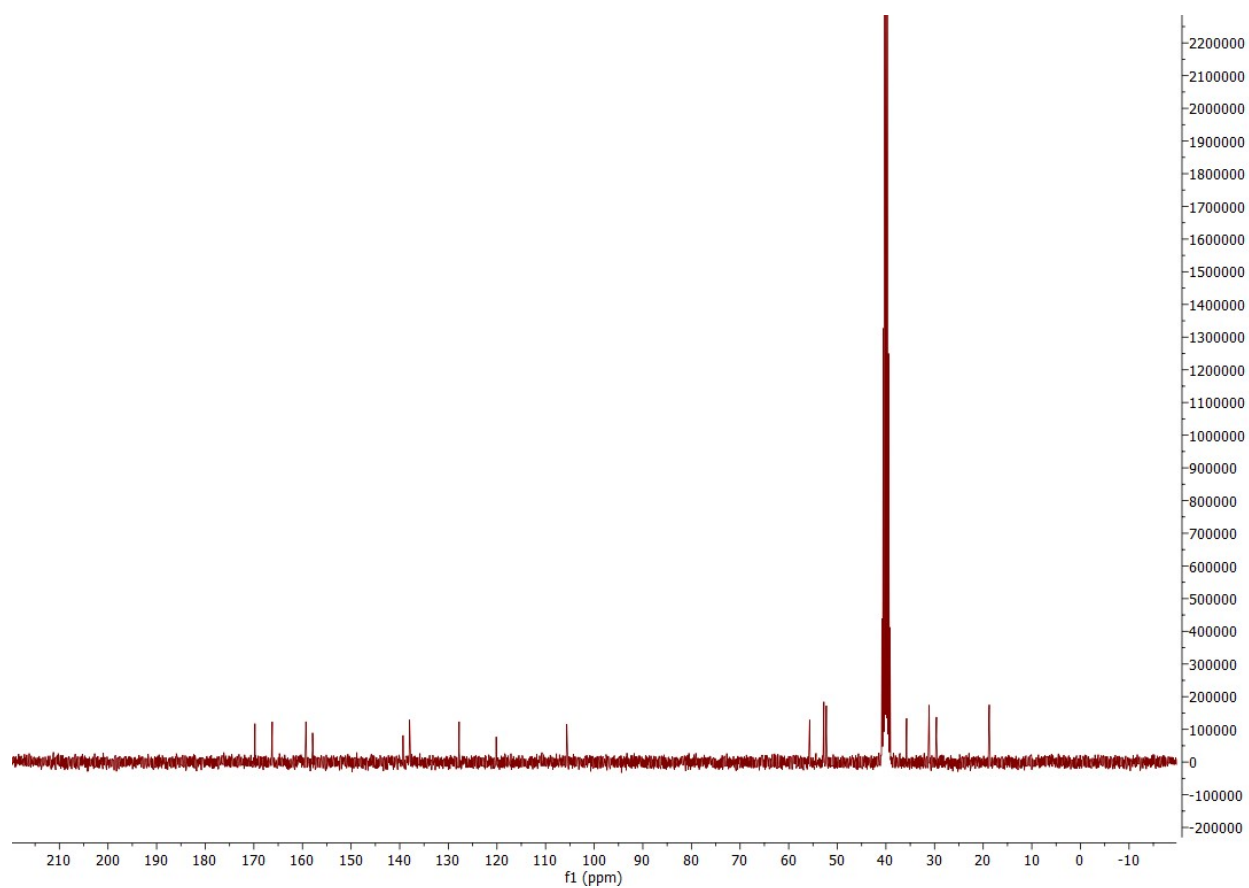

**Figure S36:**  $^{13}\text{C}$ NMR spectrum of derivative **4i**

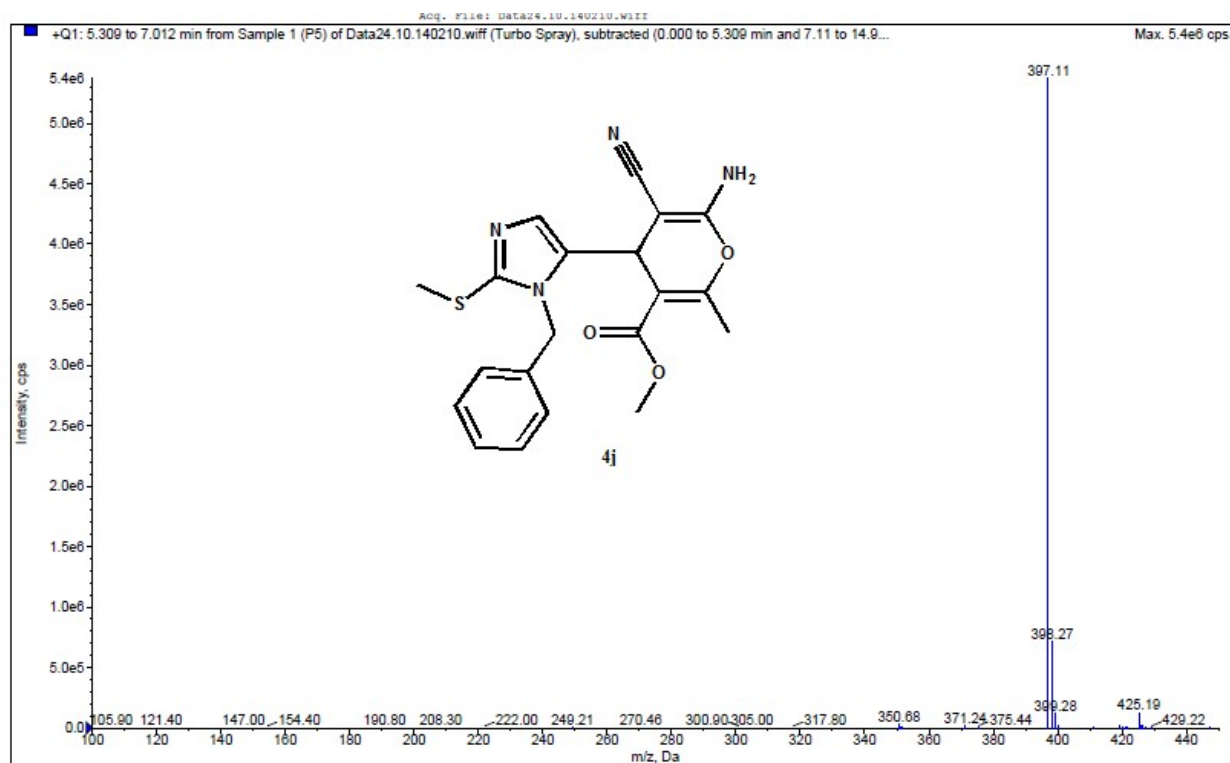

Figure S37: Mass spectrum of derivative 4j

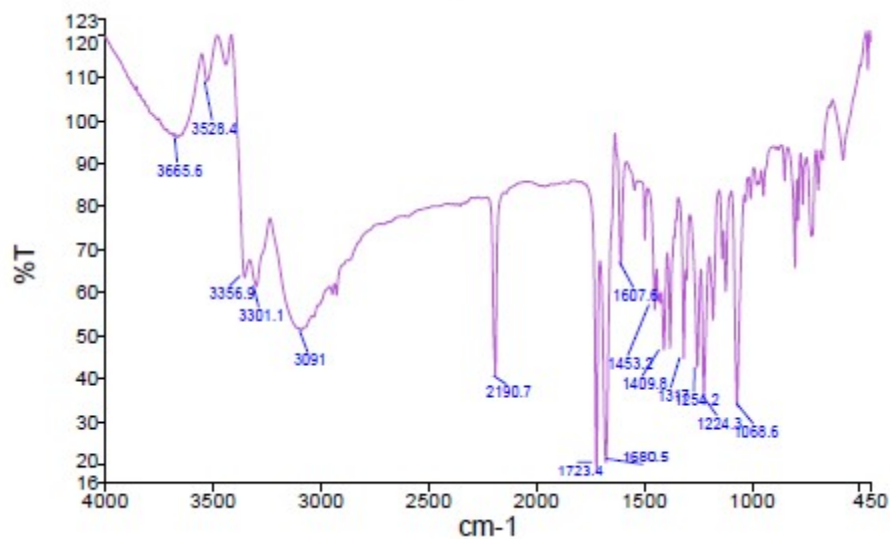

Figure S38: FTIR spectrum of derivative 4j

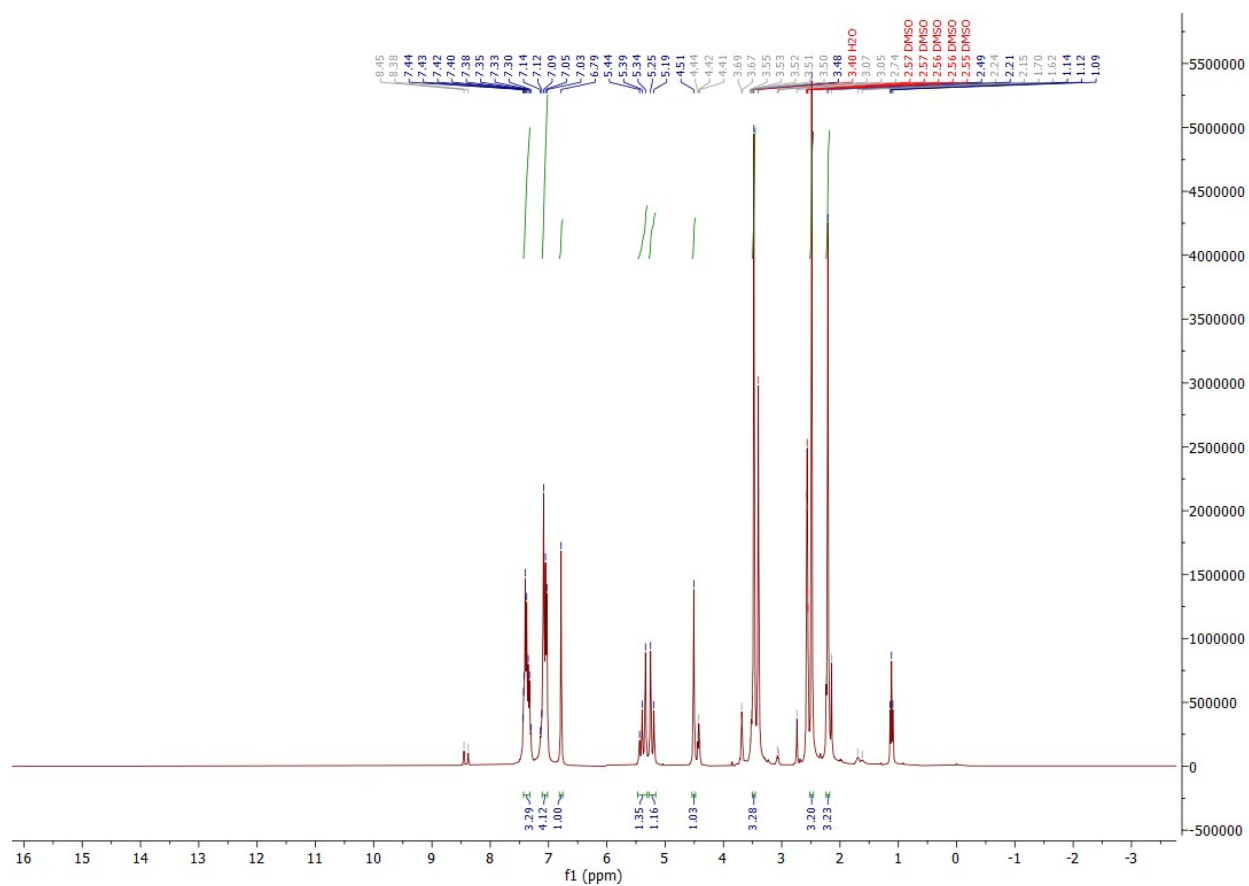

**Figure S39:** <sup>1</sup>H NMR spectrum of derivative **4j**

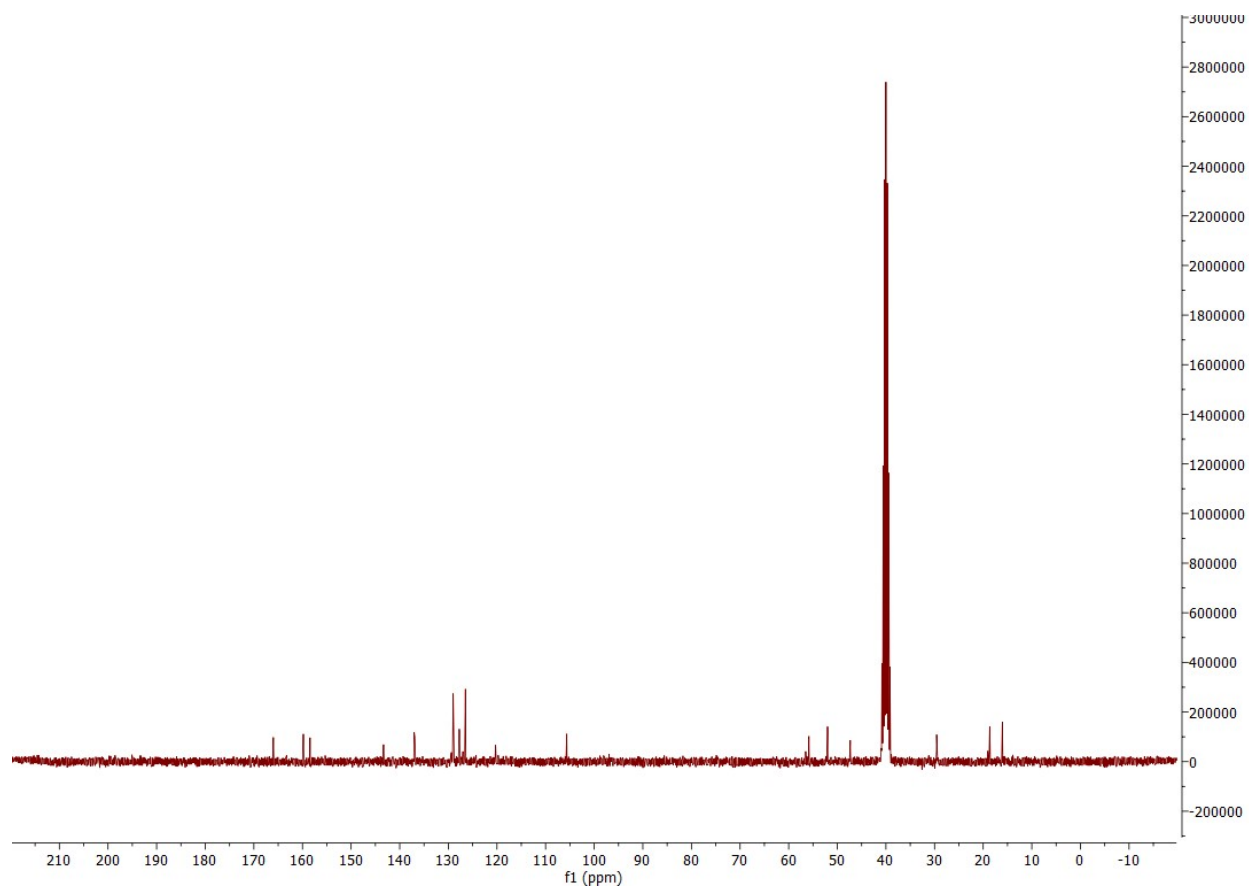

**Figure S40:**  $^{13}\text{C}$ NMR spectrum of derivative **4j**

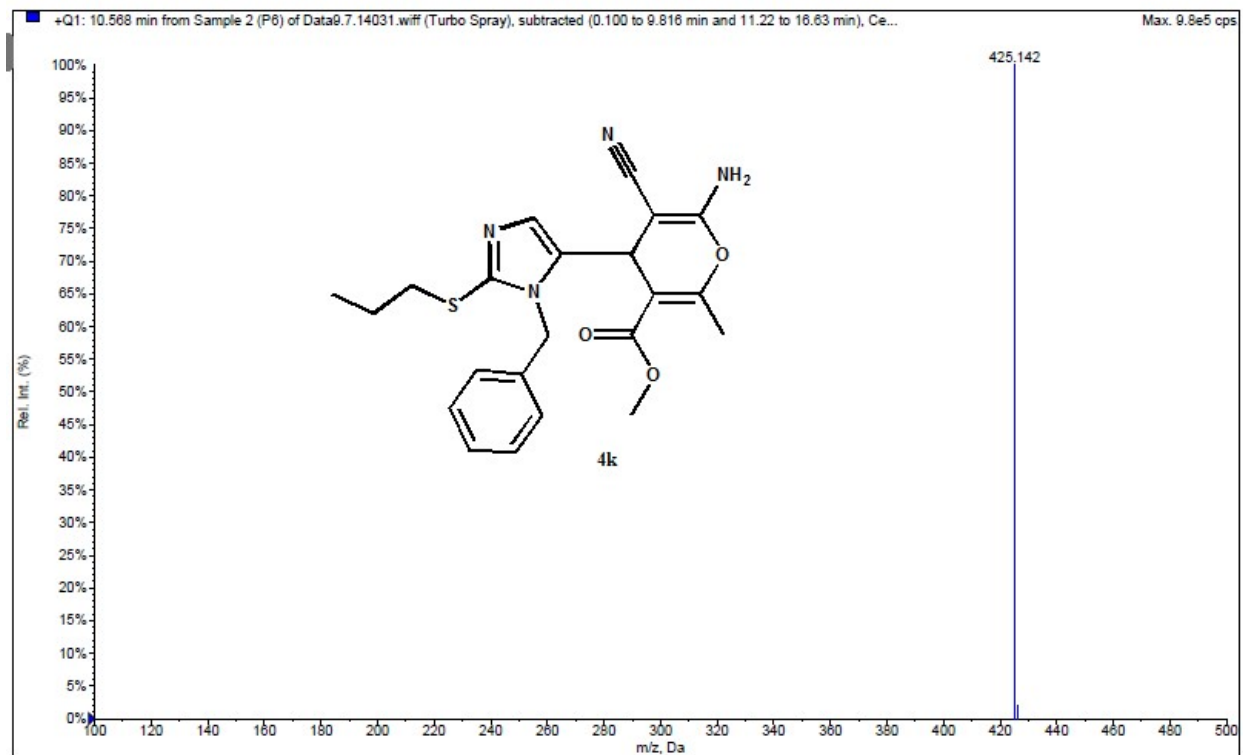

Figure S41: Mass spectrum of derivative 4k

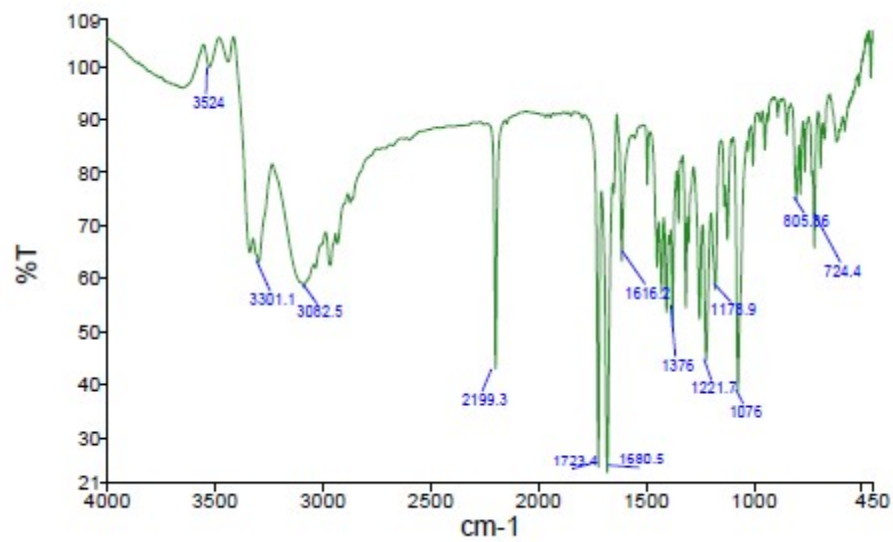

Figure S42: FTIR spectrum of derivative 4k

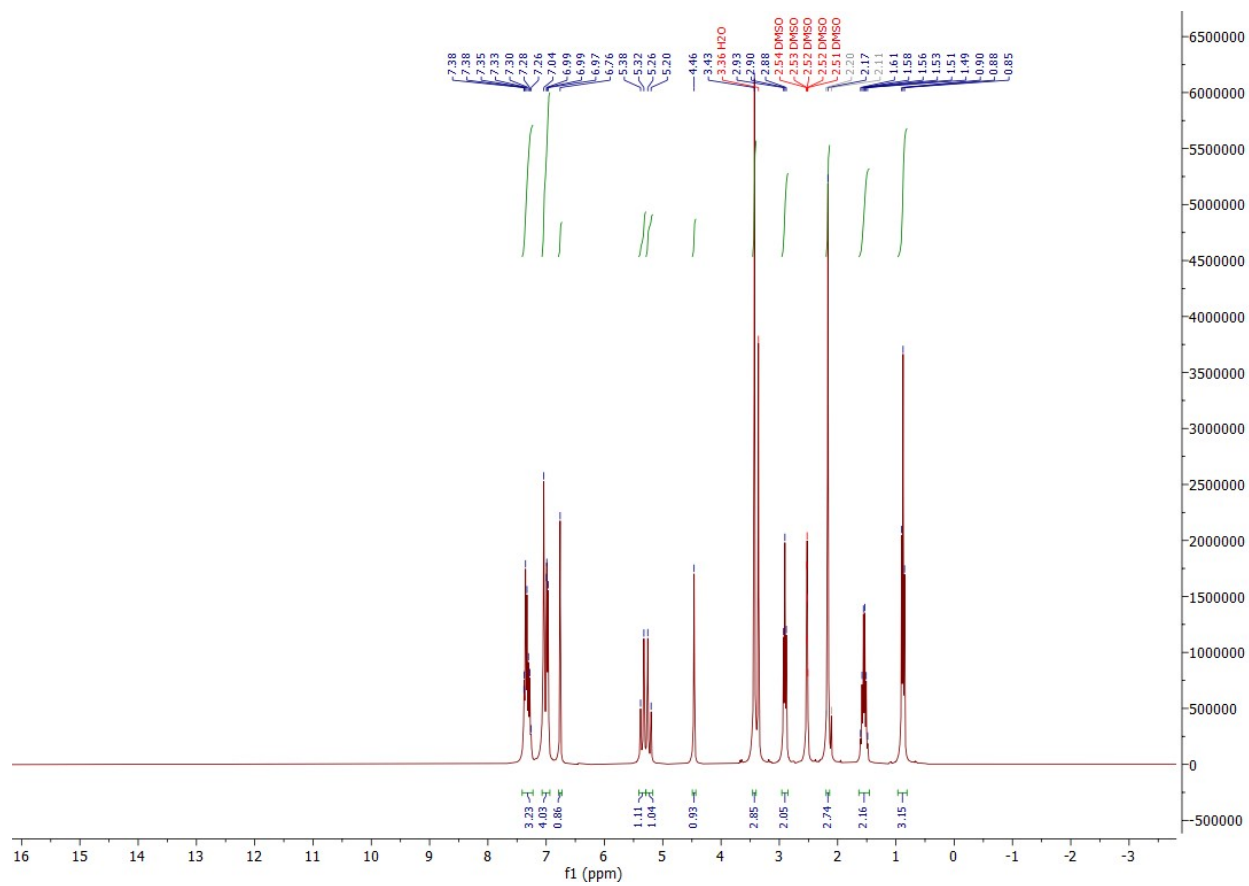

**Figure S43:** <sup>1</sup>H NMR spectrum of derivative **4k**



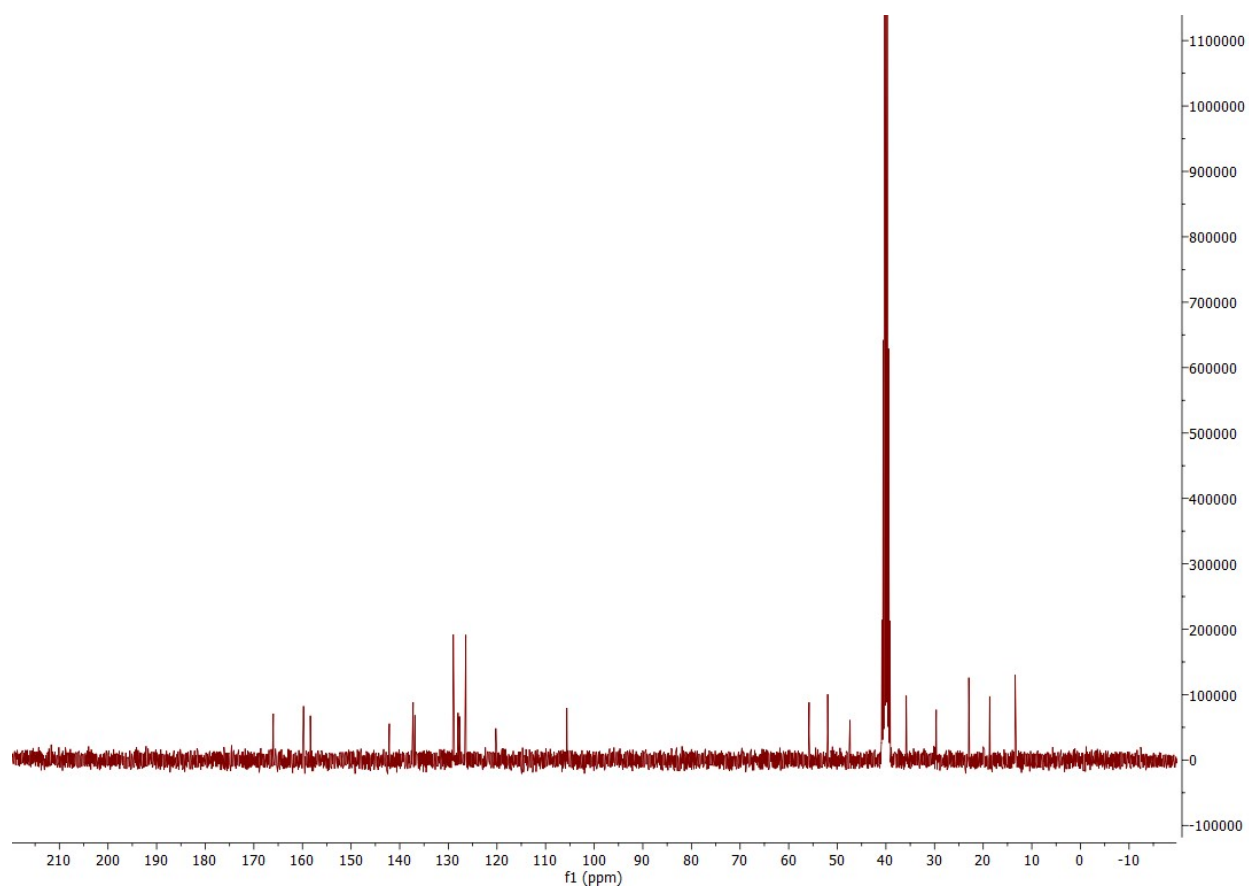

**Figure S44:**  $^{13}\text{C}$ NMR spectrum of derivative **4k**

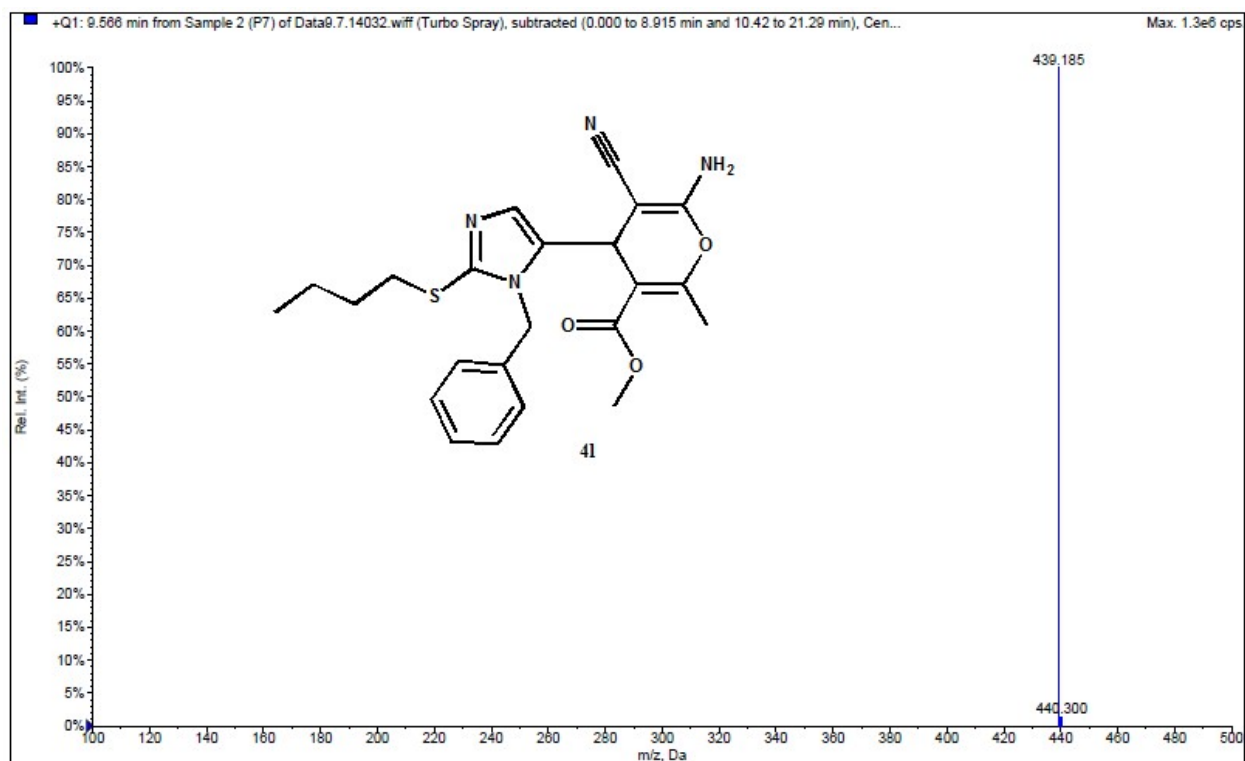

Figure S45: Mass spectrum of derivative 4l

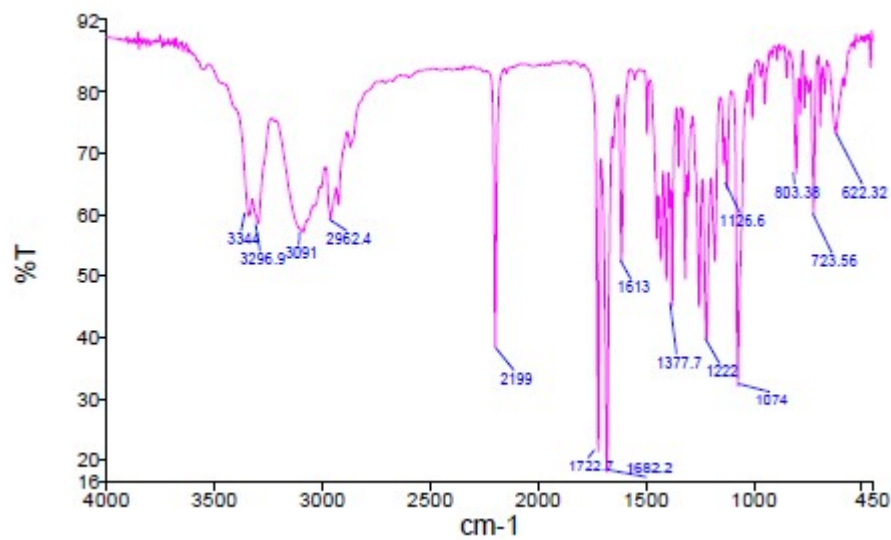

Figure S46: FTIR spectrum of derivative 4l

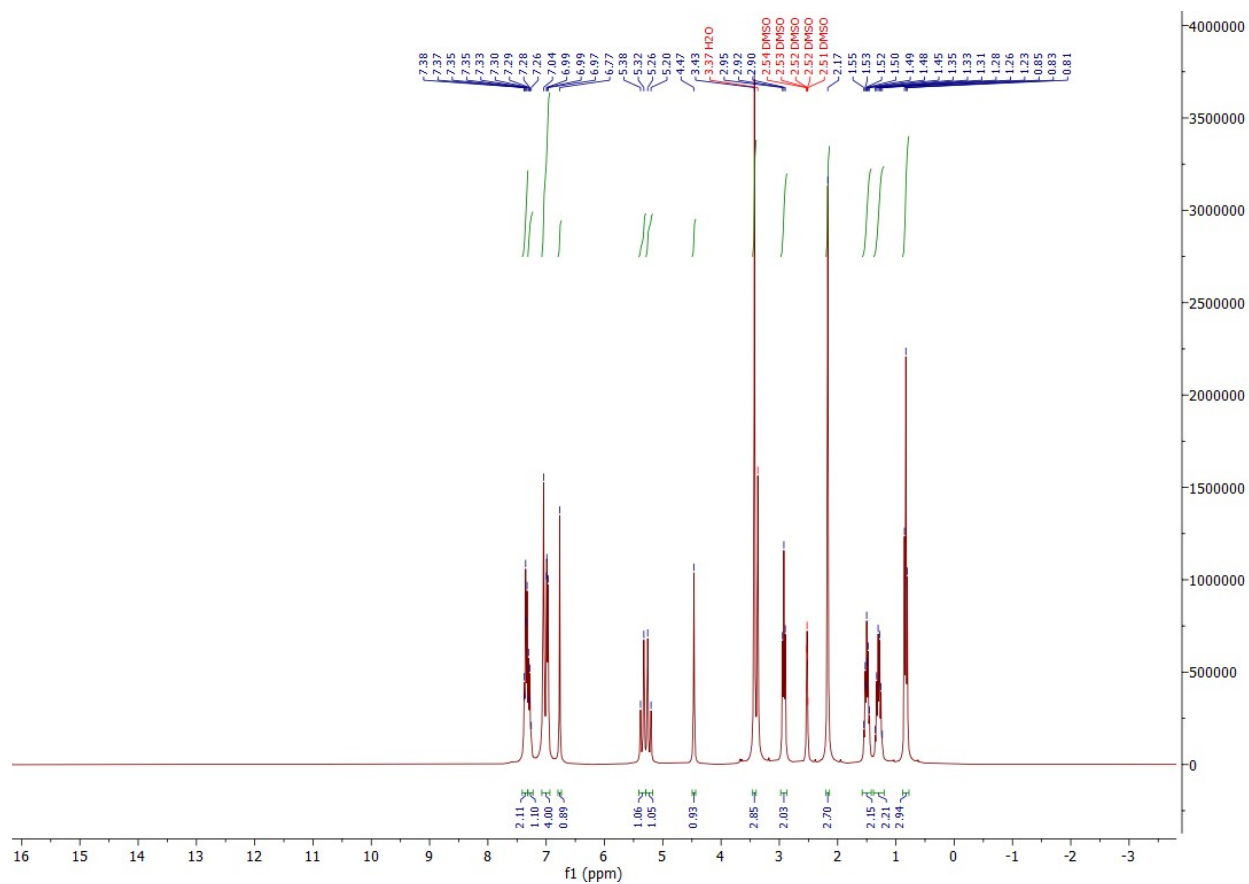

**Figure S47:** <sup>1</sup>H NMR spectrum of derivative **4I**

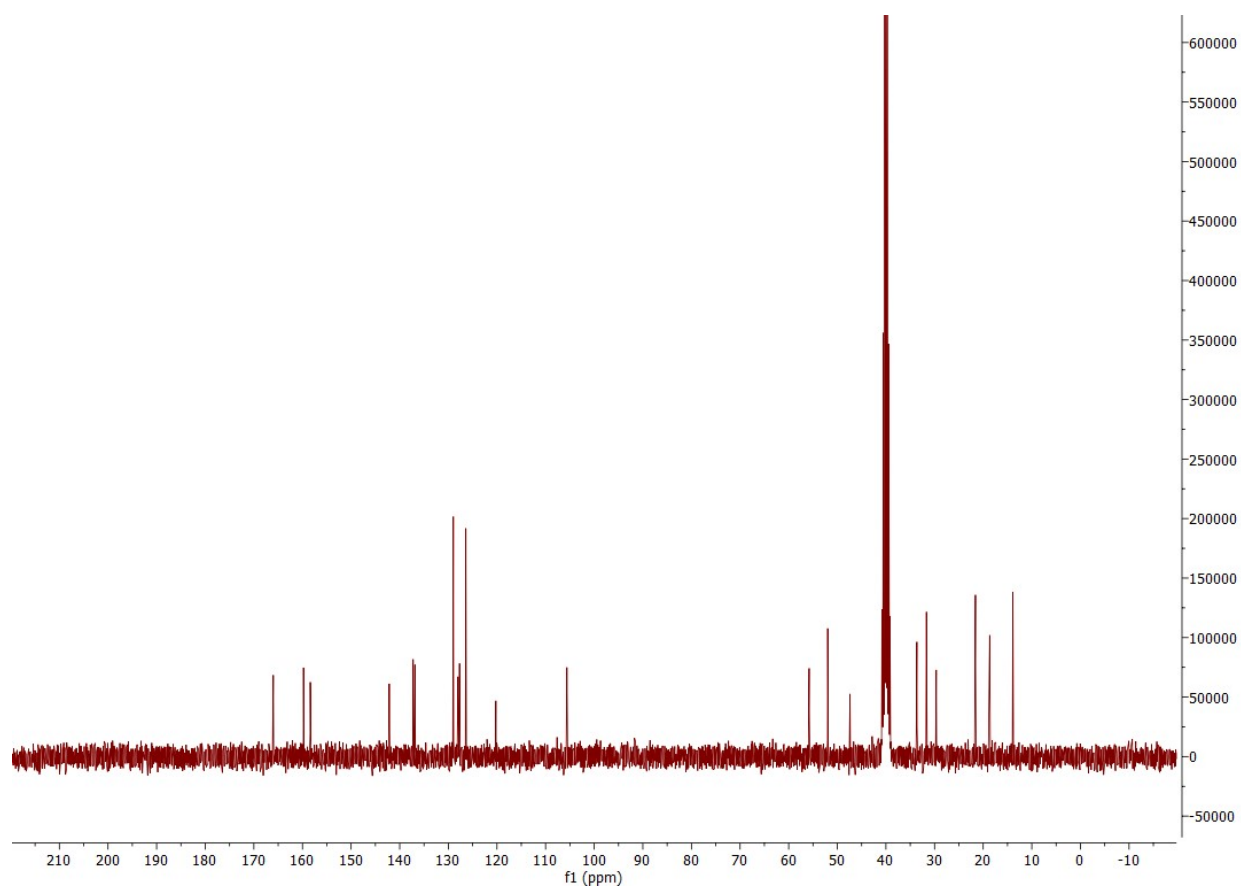

**Figure S48:**  $^{13}\text{C}$ NMR spectrum of derivative **4I**

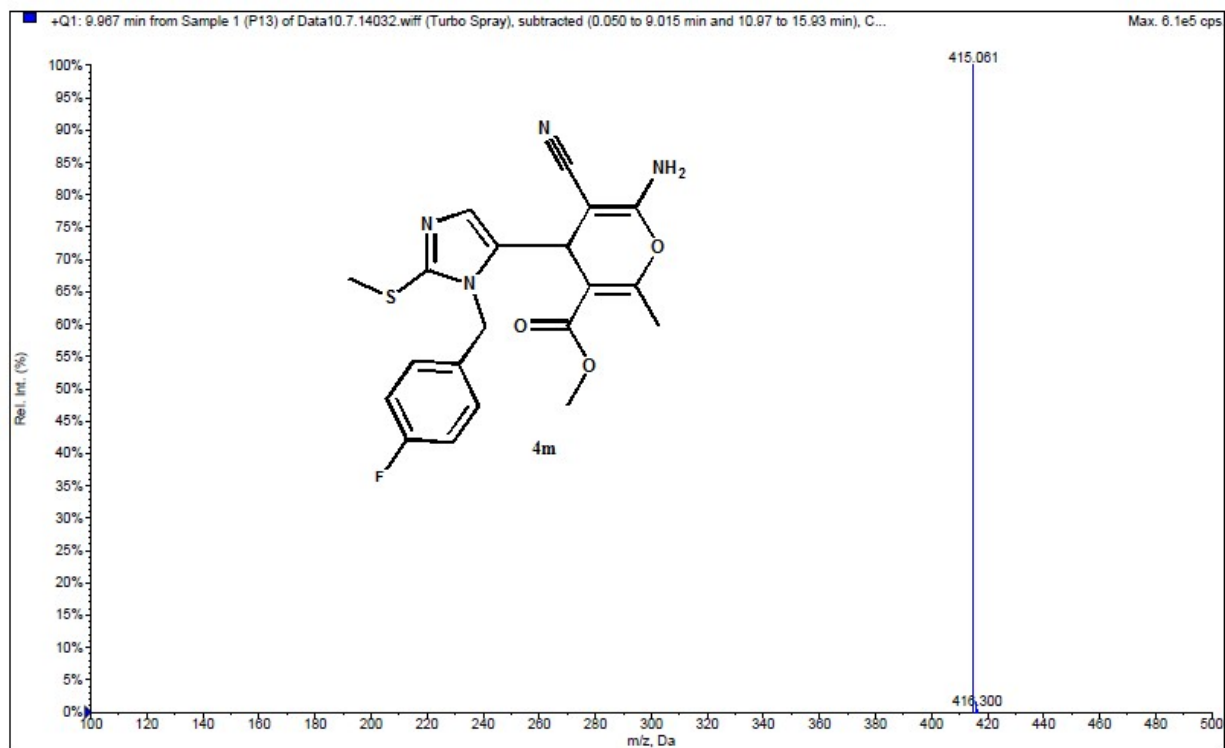

Figure S49: Mass spectrum of derivative 4m

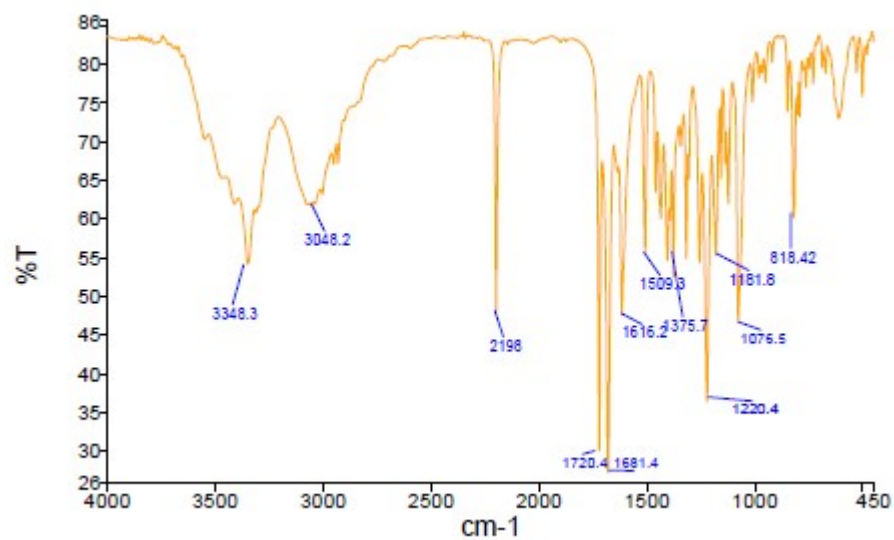

Figure S50: FTIR spectrum of derivative 4m

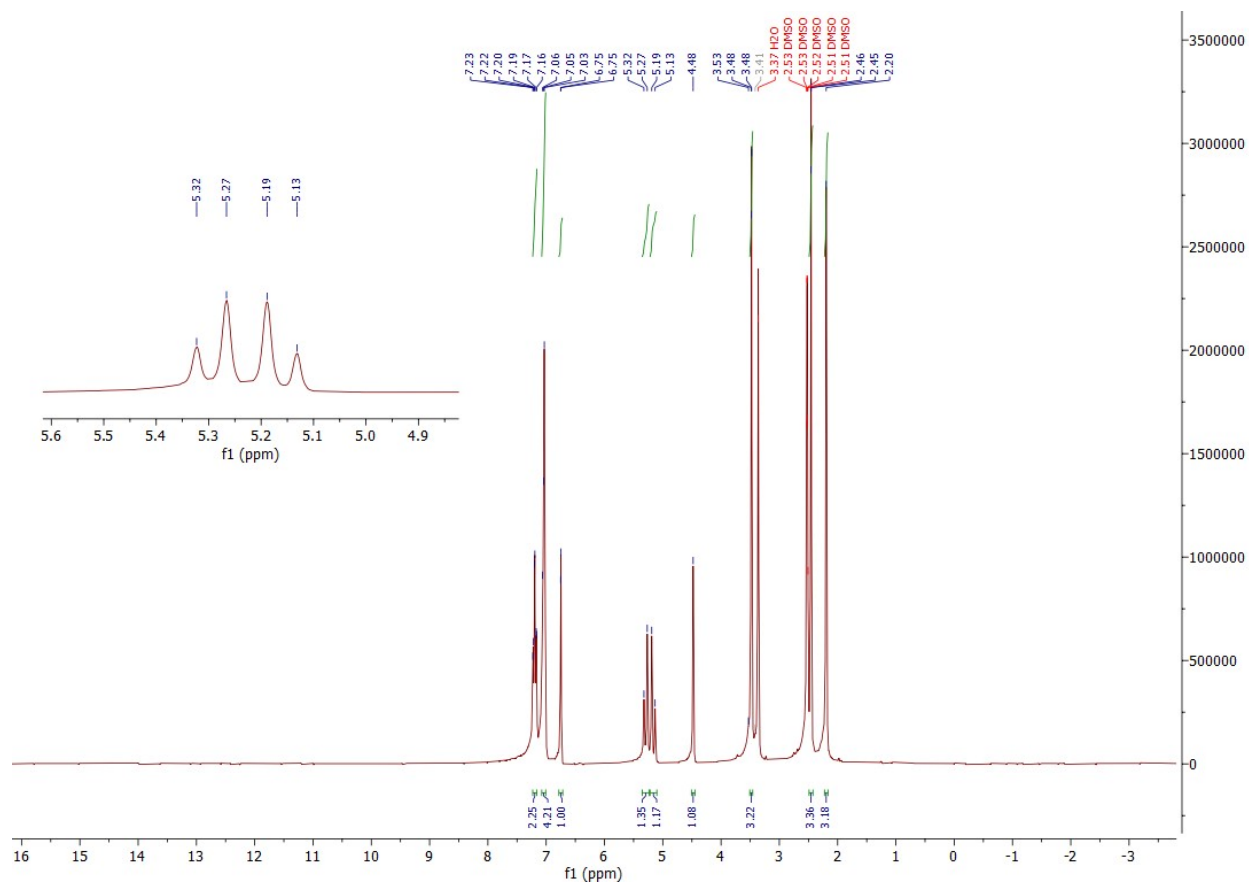

**Figure S51:** <sup>1</sup>H NMR spectrum of derivative **4m**

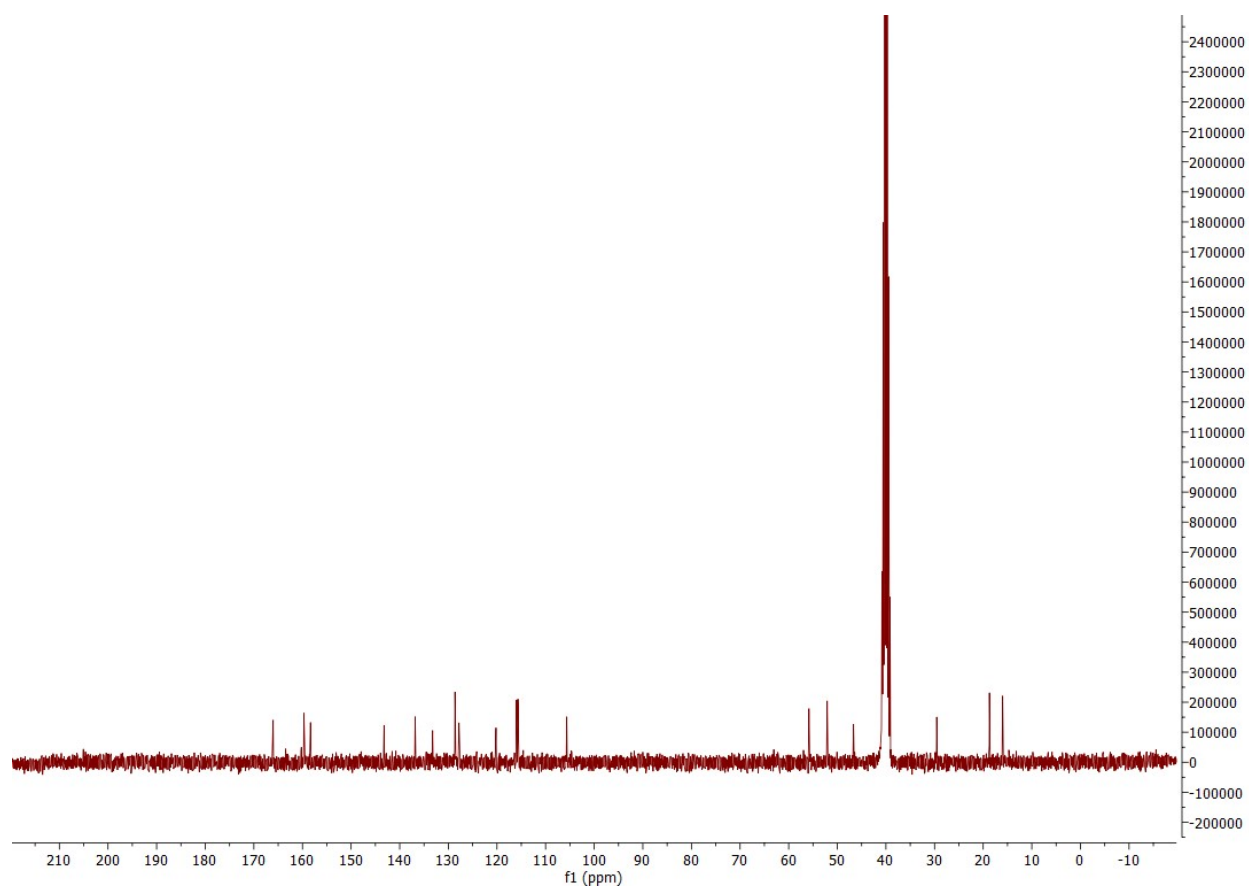

**Figure S52:**  $^{13}\text{C}$ NMR spectrum of derivative **4m**

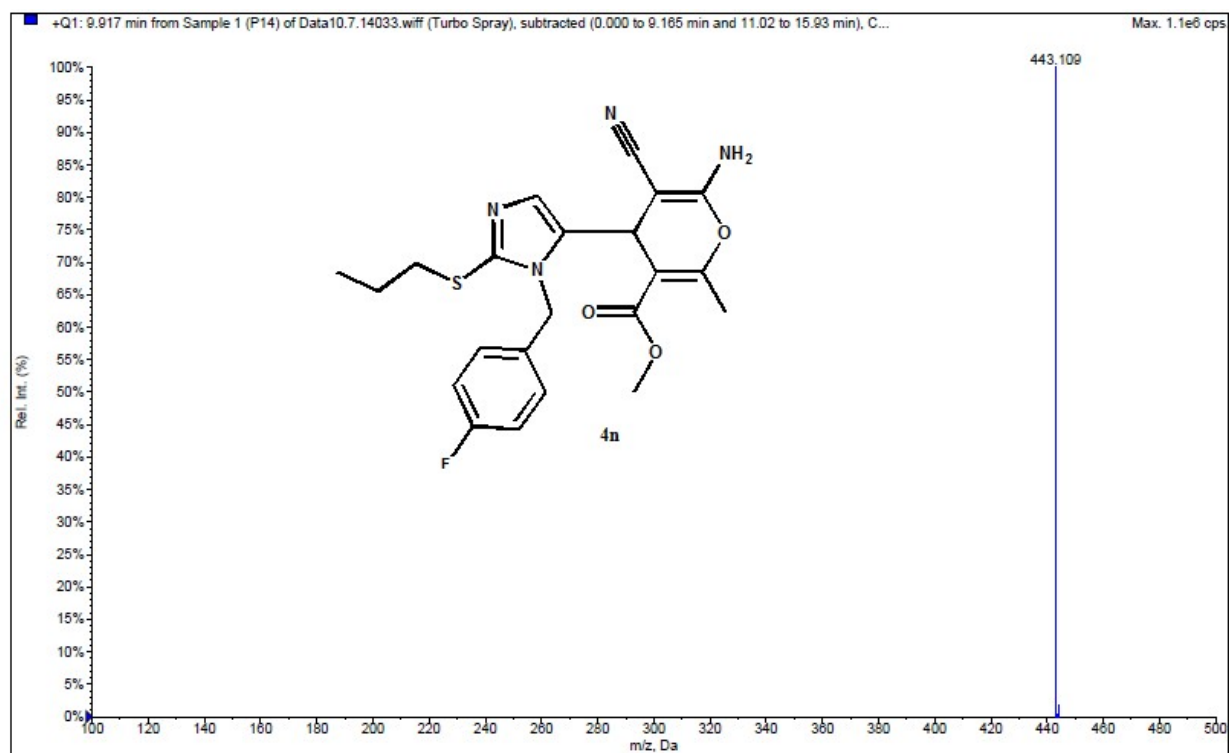

Figure S53: Mass spectrum of derivative **4n**

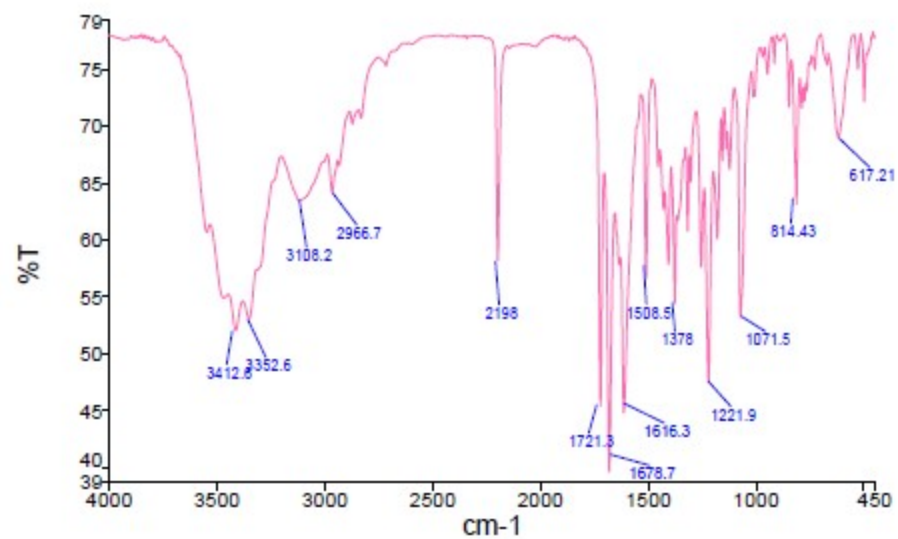

Figure S54: FTIR spectrum of derivative **4n**



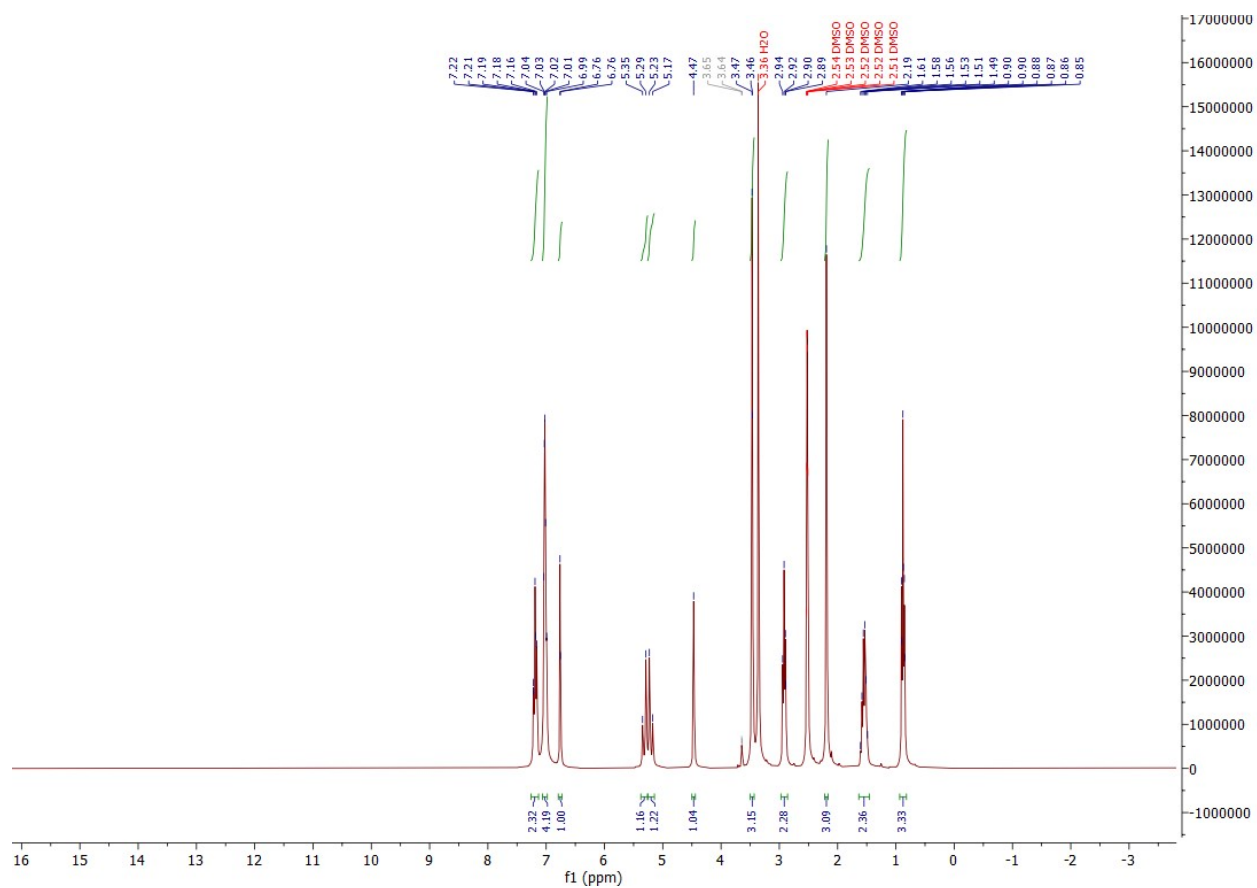

**Figure S55:**  $^1\text{H}$ NMR spectrum of derivative **4n**

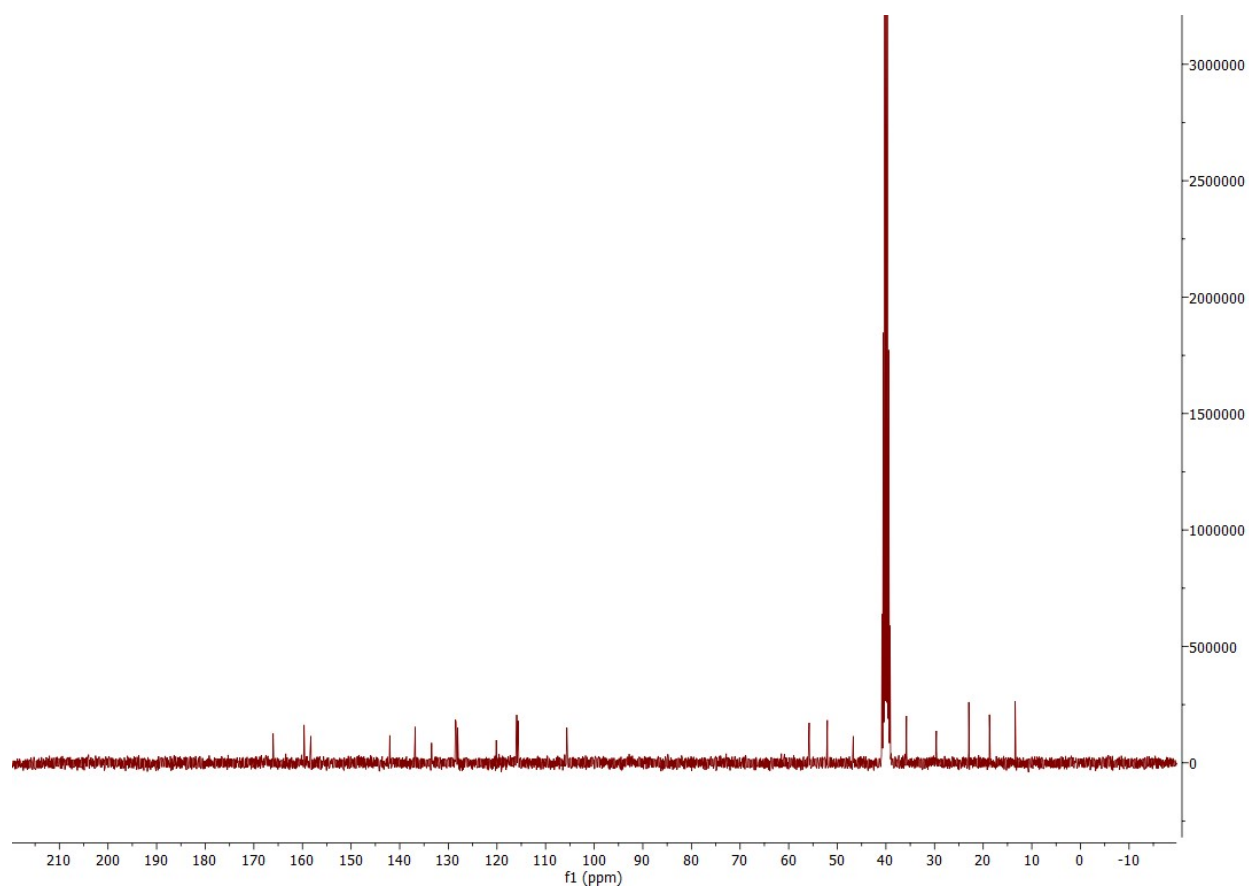

**Figure S56:**  $^{13}\text{C}$ NMR spectrum of derivative **4n**

Target: VEGFR2

| Index | SMILES                                                               | Molecules                                                                            | Predicted pIC50 | Detail               |
|-------|----------------------------------------------------------------------|--------------------------------------------------------------------------------------|-----------------|----------------------|
| 1     | <chem>NC1=C(C#N)C(C(C(OC)=O)=C(C)OI)C2=CN=C(SC)N2CC3=CC=CC=C3</chem> | 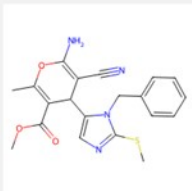 | 5.4334          | <a href="#">View</a> |

**Figure S57.** Bioactivity prediction of **4e** data from ([https://fca\\_icdb.mpu.edu.mo/codd/works/bioactivity\\_prediction](https://fca_icdb.mpu.edu.mo/codd/works/bioactivity_prediction))

Query Structure (SMILES)

O=C(OC)C1=C(C)OC(N)=C(C#N)C1C2=CN=C(SC)N2CC3=CC=CC=C3

Target Structures (One SMILES per line)

O=C(NC)C1=CC=CC=C1SC2=CC=C(C(/C=C/C3=CC=CC=N3)=NN4)C4=C2 Axitinib

Enter one SMILES notation per line for comparison

Similarity Method: Cosine

Fingerprint Type: MACCS Keys

**Compare**

### Similarity Results

| Target Structure                                                               | Similarity Score | Structure Visualization                                                             |
|--------------------------------------------------------------------------------|------------------|-------------------------------------------------------------------------------------|
| <chem>O=C(NC)C1=CC=CC=C1SC2=CC=C(C(/C=C/C3=CC=CC=N3)=NN4)C4=C2 Axitinib</chem> | 0.646            | 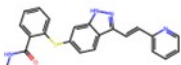 |

**Figure S58.** Similarity results between **4e** and **Axitinib** (Xray ligand 4AG8) data from <https://chemtoolshub.com/en/>.

Query Structure (SMILES)

```
O=C(OC)C1=C(C)OC(N)=C(C#N)C1C2=CN=C(SC)N2CC3=CC=CC=C3
```

Target Structures (One SMILES per line)

```
COC1=C(C(N)=O)C=C(C(OC2=CC(Cl)=C(NC(NC3CC3)=O)C=C2)=CC=N4)C4=C1 Lenvatinib
```

Enter one SMILES notation per line for comparison

Similarity Method: Cosine

Fingerprint Type: MACCS Keys

**Compare**

### Similarity Results

| Target Structure                                                                           | Similarity Score | Structure Visualization                                                              |
|--------------------------------------------------------------------------------------------|------------------|--------------------------------------------------------------------------------------|
| <chem>COC1=C(C(N)=O)C=C(C(OC2=CC(Cl)=C(NC(NC3CC3)=O)C=C2)=CC=N4)C4=C1</chem><br>Lenvatinib | 0.578            | 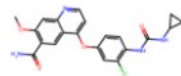 |

**Figure S59.** Similarity results between 4e and Lenvatinib (Xray ligand 3WZE) data from <https://chemtoolshub.com/en/>.

Query Structure (SMILES)

O=C(OC)C1=C(C)OC(N)=C(C#N)C1C2=CN=C(SC)N2CC3=CC=CC=C3

Target Structures (One SMILES per line)

C1C1=CC(OC2=CC=NC3=CC(OC)=C(OC)C=C32)=CC=C1NC(/N=C4NOC(C)=C\4)=O Tivozanib

Enter one SMILES notation per line for comparison

Similarity Method: Cosine

Fingerprint Type: MACCS Keys

Compare

### Similarity Results

| Target Structure                                                                           | Similarity Score | Structure Visualization                                                              |
|--------------------------------------------------------------------------------------------|------------------|--------------------------------------------------------------------------------------|
| <chem>C1C1=CC(OC2=CC=NC3=CC(OC)=C(OC)C=C32)=CC=C1NC(/N=C4NOC(C)=C\4)=O</chem><br>Tivozanib | 0.608            | 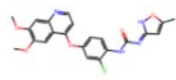 |

**Figure S60.** Similarity results between 4e and Tivozabin (Xray ligand 4ASE) data from <https://chemtoolshub.com/en/>.

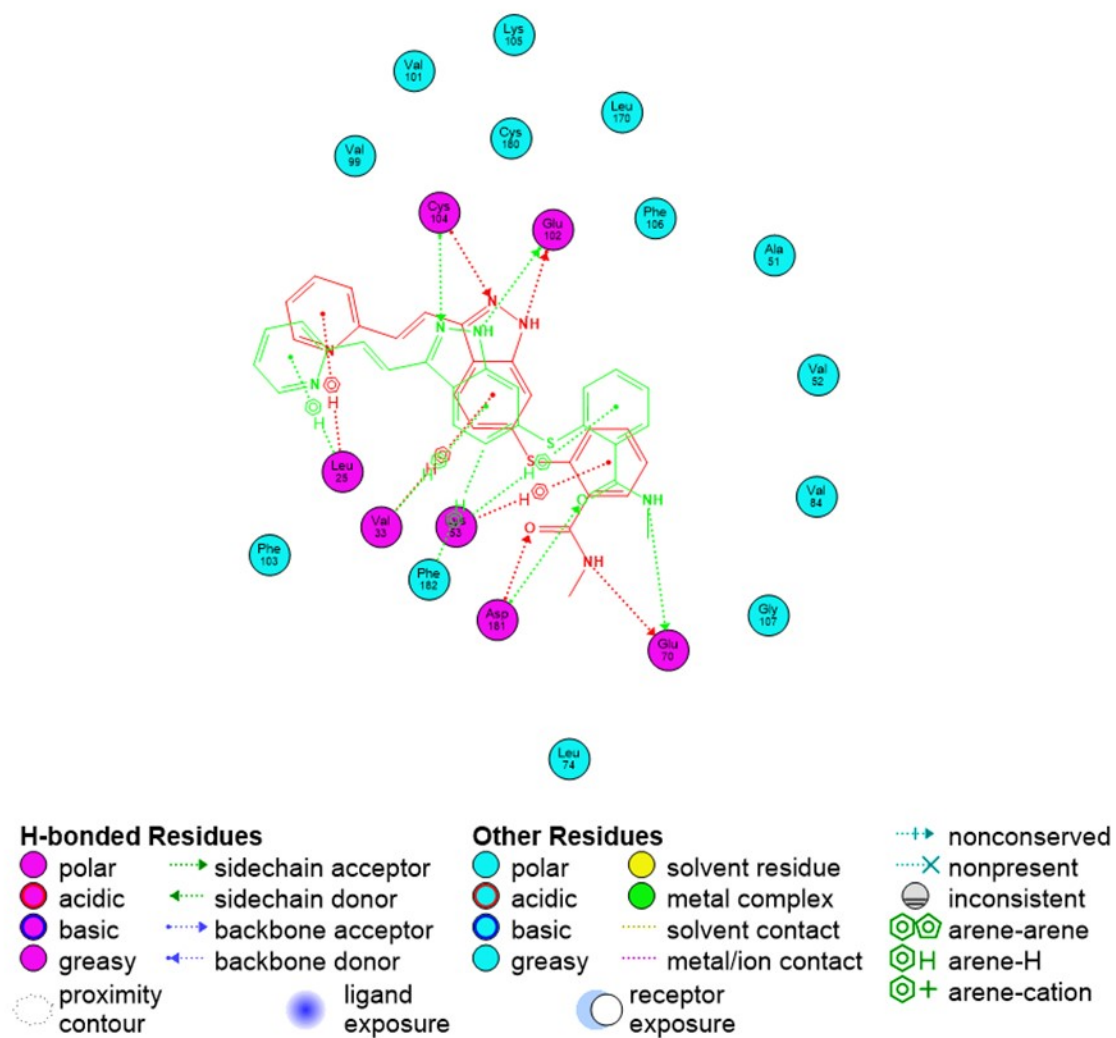

**Figure S61.** The superimpose structure of X-ray crystal **Axitinib** (green) vs docked **Axitinib** (red).

## DockRMSD Results

```
#####
# DockRMSD (v1.1): docking pose distance calculation #
# #
# If you use DockRMSD in your work, please cite: #
# #
# Bell, E.W., Zhang, Y. DockRMSD: an open-source tool for atom #
# mapping and RMSD calculation of symmetric molecules through graph #
# isomorphism. Journal of Cheminformatics, 11:40 (2019). #
#####

Calculated Docking RMSD: 0.430

Total # of Possible Mappings: 432
Optimal mapping (First file -> Second file, * indicates correspondence is not one-to-one):
O 1 -> O 1
C 2 -> C 2
N 3 -> N 3
C 4 -> C 5 *
C 5 -> C 9 *
C 6 -> C 10 *
C 7 -> C 12 *
C 8 -> C 14 *
C 9 -> C 16 *
C 10 -> C 17 *
S 11 -> S 19 *
C 12 -> C 20 *
C 13 -> C 21 *
C 14 -> C 23 *
C 15 -> C 25 *
C 16 -> C 27 *
N 17 -> N 28 *
N 18 -> N 30 *
C 19 -> C 31 *
C 20 -> C 32 *
C 21 -> C 33 *
C 22 -> C 35 *
C 23 -> C 37 *
N 24 -> N 38 *
C 25 -> C 39 *
C 26 -> C 41 *
C 27 -> C 43 *
C 28 -> C 45 *
```

**Figure S62.** RMSD of redock **Axitinib** data from <https://zhanggroup.org/DockRMSD>

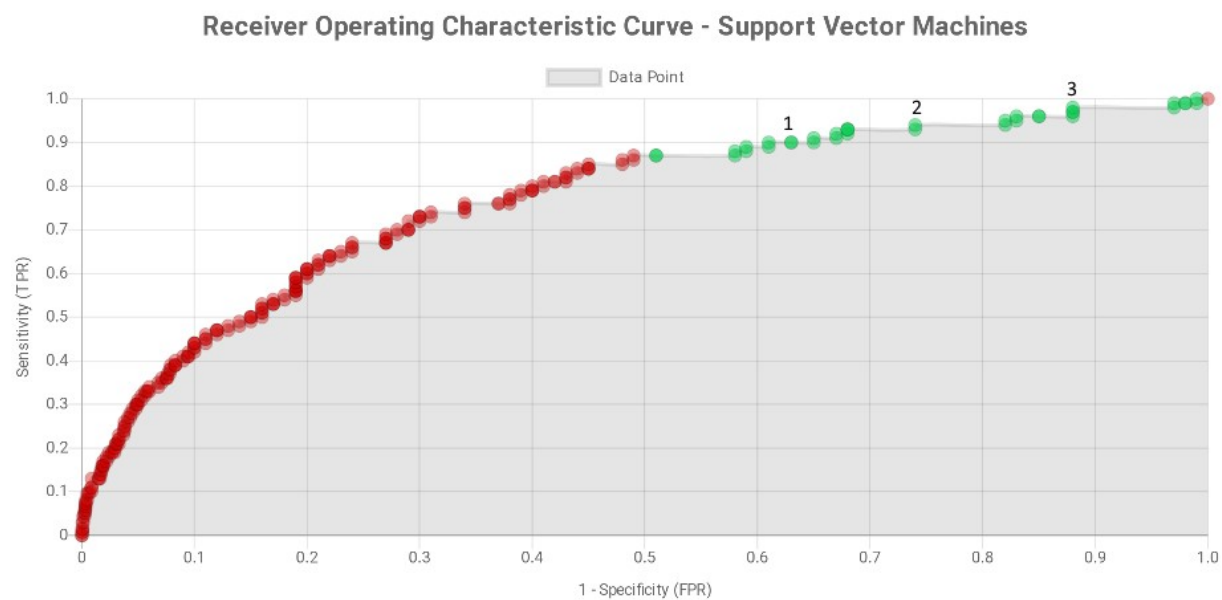

**Figure S63.** ROC curve for SVM model of **4e** bonded to VEGFR2



| Compound | Molecular mass<br>( $\leq 500$ g/mol) | Hydrogen bond<br>donor ( $\leq 5$ ) | Hydrogen bond<br>acceptors( $\leq 10$ ) | LogP( $\leq 5$ ) | Molar Refractivity<br>(40-130) | PASS |
|----------|---------------------------------------|-------------------------------------|-----------------------------------------|------------------|--------------------------------|------|
| 4a       | 320                                   | 2                                   | 6                                       | 1.396680         | 80.357384                      | Pass |
| 4b       | 334                                   | 2                                   | 6                                       | 1.786780         | 84.974380                      | Pass |
| 4c       | 348                                   | 2                                   | 6                                       | 2.176880         | 89.591377                      | Pass |
| 4d       | 362                                   | 2                                   | 6                                       | 2.566980         | 94.208374                      | Pass |
| 4e       | 396                                   | 2                                   | 6                                       | 2.967080         | 104.579384                     | Pass |
| 4f       | 410                                   | 2                                   | 6                                       | 3.275499         | 109.316383                     | Pass |
| 4g       | 414                                   | 2                                   | 6                                       | 3.106179         | 104.537392                     | Pass |
| 4h       | 410                                   | 2                                   | 6                                       | 3.275499         | 109.316383                     | Pass |
| 4i       | 378                                   | 2                                   | 8                                       | 0.939880         | 91.316383                      | Pass |
| 4j       | 396                                   | 2                                   | 6                                       | 1.464440         | 101.665894                     | Pass |
| 4k       | 424                                   | 2                                   | 6                                       | 2.244640         | 110.899887                     | Pass |
| 4l       | 438                                   | 2                                   | 6                                       | 2.634740         | 115.516884                     | Pass |
| 4m       | 414                                   | 2                                   | 6                                       | 1.761640         | 101.716896                     | Pass |
| 4n       | 442                                   | 2                                   | 6                                       | 2.541840         | 110.950890                     | Pass |

**1S Table.** Lipinski's rule of five properties predictions of title compounds

**Table S2.** The docking scores (kcal/mol) for compounds **4e** and **4h** bond to VEGFR2

| Compound | VEGFR2 PDB IDs |       |       |
|----------|----------------|-------|-------|
|          | 4ASE           | 3WZD  | 4AG8  |
| 4e       | -7.09          | -6.23 | -8.29 |
| 4h       | -7.46          | -6.30 | -8.20 |

**Table S3.** Similarity between **4e** and Xray ligands of different VEGFR2 proteins

|                                        | VEGFR2 PDB IDs                           |                                          |                                          |
|----------------------------------------|------------------------------------------|------------------------------------------|------------------------------------------|
|                                        | <b>4ASE</b><br><b>Resolution: 1.83 Å</b> | <b>3WZD</b><br><b>Resolution: 1.57 Å</b> | <b>4AG8</b><br><b>Resolution: 1.95 Å</b> |
| Xray ligand<br>( <b>4e</b> similarity) | Tivozanib<br>(0.608)                     | Lenvatinib<br>(0.578)                    | Axitinib<br>(0.646)                      |

**Table S4.** RMSD for redocking x-ray ligands on 11 different PDB IDs for VEGFR2

|          | 1Y6B | 2OH4 | 3C7Q | 3CJF | 3CJG | 3VHE | 3VNT | 3VO3 | 5EW3 | 6GQO | 6GQQ |
|----------|------|------|------|------|------|------|------|------|------|------|------|
| RMSD (Å) | 2.01 | 0.29 | 2.13 | 2.33 | 1.54 | 1.83 | 1.01 | 0.43 | 0.40 | 0.41 | 0.70 |

**Table S5.** specificity and sensitivity three points in ROC curve

| Point no | Specificity | Sensitivity | Prediction |
|----------|-------------|-------------|------------|
| 1        | 0.63        | 0.90        | Active     |
| 2        | 0.74        | 0.94        | Active     |
| 3        | 0.88        | 0.96        | Active     |
